# Supplementary material for: Tailored charge-neutral self-assembled L2Zn2 container for taming oxalate
Source: publisher site journal article supplement (doi:10.3762/bjoc.20.250), 2024-11-18
Supplement: Additional file 1 [file 1860-5397-20-250-S1.pdf]

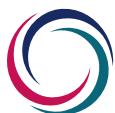

## Supporting Information

for

### Tailored charge-neutral self-assembled $L_2Zn_2$ container for taming oxalate

David Ocklenburg and David Van Craen

*Beilstein J. Org. Chem.* **2024**, *20*, 3007–3015. doi:10.3762/bjoc.20.250

**Synthetic protocols, characterization data, NMR spectra, guest binding investigations, data fitting, and computational modeling details**

## 1. Materials and methods

Solvents and chemicals were obtained from Alfa Aesar, abcr, TCI, chemPUR and VWR.  $\text{CDCl}_3$  and  $\text{DMSO}-d_6$  from Eurisotop were used for binding studies and characterization of products. Column chromatography was performed with silica gel 60 Å (0.06–0.2 mm). NMR spectroscopy ( $^1\text{H}$ ,  $^{13}\text{C}$ , COSY, NOESY, HSQC, HMBC and VT) was performed with a 500 MHz Bruker Avance NEO NMR spectrometer. High-resolution mass spectrometry was conducted using a Bruker timsTOF spectrometer and UV-Vis spectroscopy was accomplished using an Agilent HP-8453 UV-Vis (DAD) instrument.

## 2. Synthetic procedures

### 2.1. 3-(Azidomethyl)quinolin-8-yl *tert*-butyl carbonate (S1)

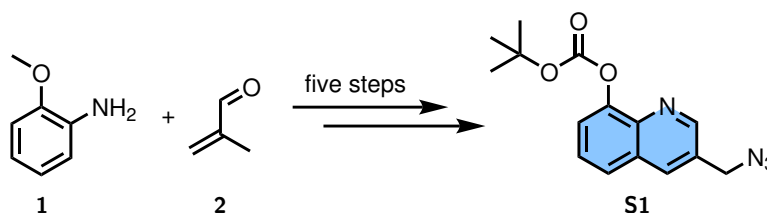

The azide **S1** was prepared in five steps according to the synthetic route starting from *o*-anisidine (**1**) and methacrolein (**2**) reported by Van Craen and co-workers.<sup>[1]</sup>

### 2.2. *N,N*-Di(prop-2-yn-1-yl)benzamide (S2)

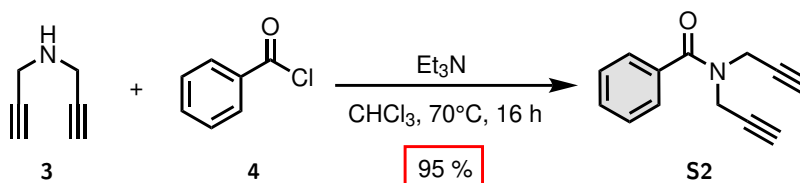

Dipropargylamine (**3**, 1.11 mL, 10.74 mmol, 3 equiv) was dissolved in chloroform (50 mL) and triethylamine (1.49 mL, 10.74 mmol, 3 equiv) was added. After 5 min of stirring benzoyl chloride (**4**, 0.41 mL, 3.58 mmol, 1 equiv) was added slowly and the reaction mixture was stirred over night at  $70^\circ\text{C}$ . Then the reaction mixture was quenched with water. Afterwards the aqueous phase was extracted three times with chloroform. The combined organic phase was dried over magnesium sulfate and the solvent was evaporated under reduced pressure. Column chromatography (silica, pentane/ethyl acetate 9:1) gives *N,N*-di(prop-2-yn-1-yl)benzamide (**S2**) as a yellowish oil, which crystallizes in the fridge (95%, 668.9 mg, 3.39 mmol). The  $^1\text{H}$  NMR data is in line with the reported values in the literature.<sup>[2,3,4]</sup>

$^1\text{H}$  NMR (500 MHz,  $\text{CDCl}_3$ ,  $25^\circ\text{C}$ ):  $\delta$  = 7.59–7.53 (m, 2H), 7.50–7.40 (m, 3H), 4.47 (br. s, 2H), 4.20 (br. s, 2H), 2.32 (br. s, 2H) ppm.

### 2.3. *N,N*-Bis((1-((8-hydroxyquinolin-3-yl)methyl)-1*H*-1,2,3-triazol-4-yl)methyl)benzamide (L-H<sub>2</sub>)

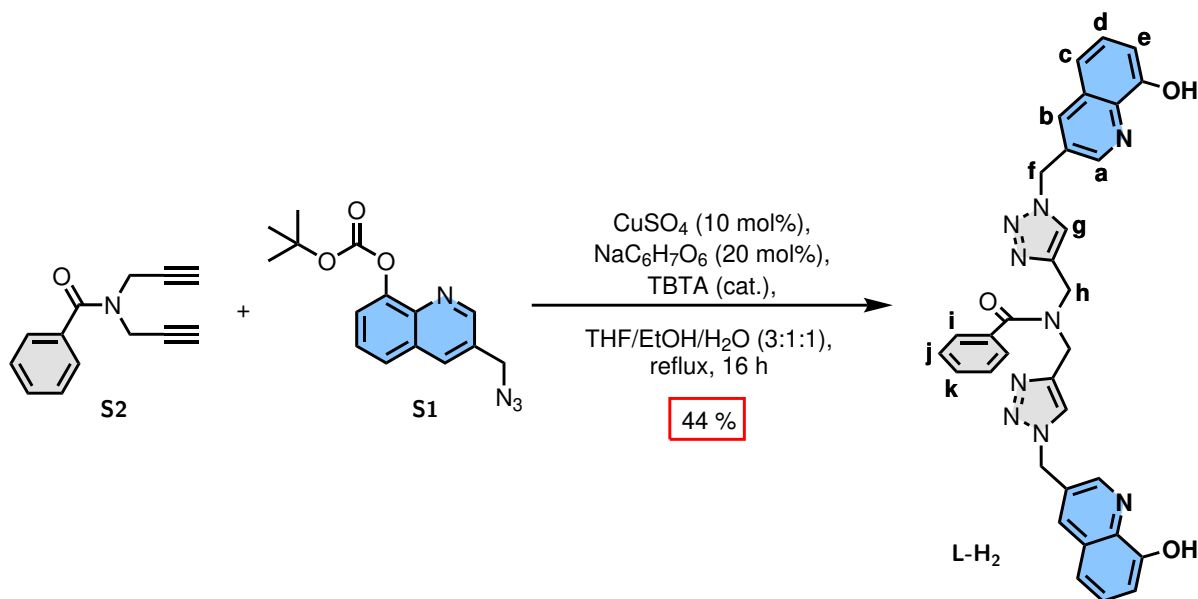

The azide (**S1**, 85.4 mg, 284  $\mu\text{mol}$ , 2.2 equiv) was dissolved in a mixture of THF/EtOH/H<sub>2</sub>O (3:1:1, 10 mL, 0.01 M) and transferred into a Schlenk tube. The solution was degassed for 20 min with argon.  $\text{CuSO}_4$  (2 mg, 13  $\mu\text{mol}$ , 0.1 equiv), sodium ascorbate (12.8 mg, 64.6  $\mu\text{mol}$ , 0.5 equiv) and TBTA (0.7 mg, 1.3  $\mu\text{mol}$ , 0.01 equiv) were sequentially added. Benzamide (**S2**, 25.5 mg, 129  $\mu\text{mol}$ , 1 equiv) was added under argon and the reaction solution was heated to 100 °C and stirred for 16 h in a closed tube. The reaction solution was diluted with chloroform and the organic phase was washed with EDTA (0.25 mM), brine and saturated ammonium chloride solution. The aqueous phase was extracted with chloroform. The combined organic phase was dried with  $\text{MgSO}_4$  and the solvent was removed under reduced pressure. Column chromatography (silica, DCM/MeOH gradient 0 % - 5 %) yields the ligand **L-H<sub>2</sub>** as a brown-greenish solid (44 %, 34.3 mg, 57.4  $\mu\text{mol}$ ). The Boc-protection groups were cleaved during the workup right away.

<sup>1</sup>H NMR (600 MHz, DMSO-*d*<sub>6</sub>, 25 °C):  $\delta$  = 9.92 (s, 2H, OH), 8.84 (s, 2H, H<sub>a</sub>), 8.21 (s, 2H, H<sub>g</sub>), 8.19 (s, 2H, H<sub>b</sub>), 7.52 (d,  $J$  = 6.9 Hz, 2H, H<sub>i</sub>), 7.46-7.37 (m, 7H, H<sub>j</sub>, H<sub>k</sub>, H<sub>d</sub> and H<sub>c</sub>), 7.09 (d,  $J$  = 7.5 Hz, 2H, H<sub>e</sub>), 5.81 (s, 4H, H<sub>f</sub>), 4.63 (s, 2H, H<sub>h</sub>), 4.49 (s, 2H, H<sub>h'</sub>) ppm. <sup>13</sup>C NMR (151 MHz, DMSO-*d*<sub>6</sub>, 25 °C):  $\delta$  = 170.50, 153.40, 148.07, 143.27, 137.96, 135.84, 135.10, 129.66, 129.48, 128.35, 128.23, 128.16, 126.88, 123.98, 117.77, 111.88, 50.51, 43.91 ppm. HRMS (positive ESI-MS, MeCN, acidified):  $m/z$  = 598.2339 ( $M + \text{H}^+$ ,  $\text{C}_{33}\text{H}_{28}\text{N}_9\text{O}_3^+$ , calcd. 598.2310), 620.2112 ( $M + \text{Na}^+$ ,  $\text{C}_{33}\text{H}_{27}\text{N}_9\text{O}_3\text{Na}^+$ , calcd. 620.2129).

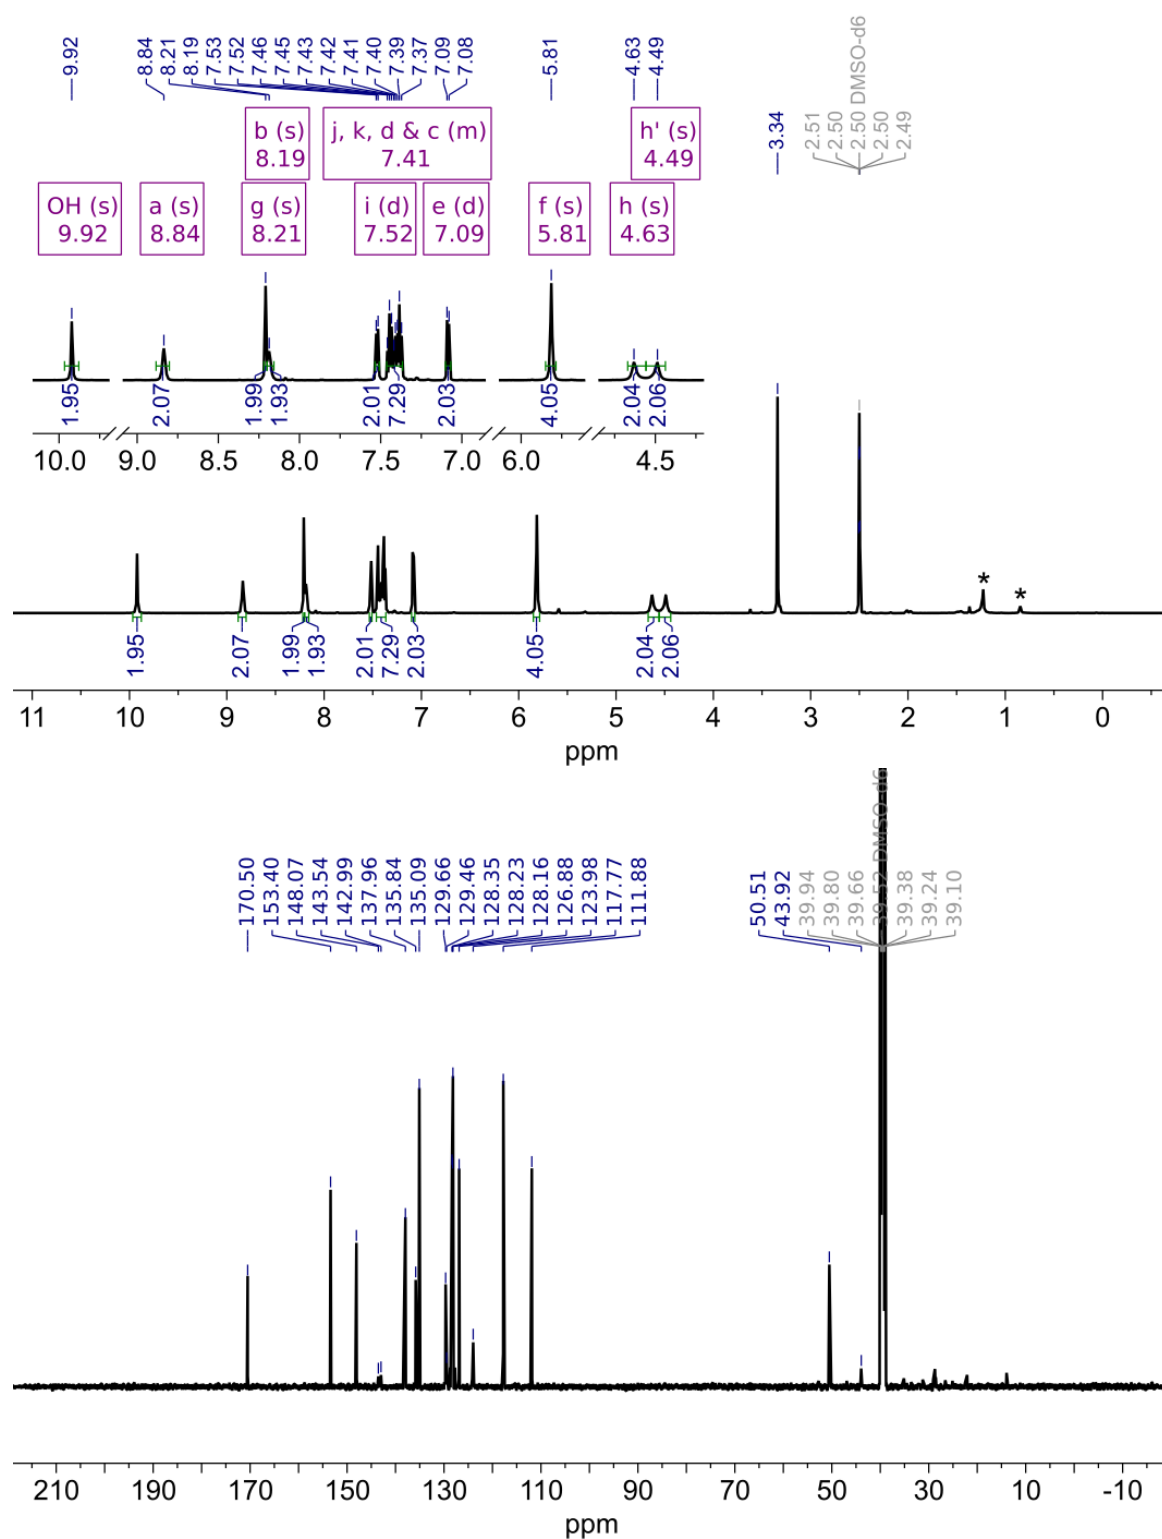

**Figure S1:** <sup>1</sup>H (top) and <sup>13</sup>C NMR spectrum (bottom) of ligand L-H<sub>2</sub>. Signals labeled with a \* refer to grease. Splitting of C<sub>h</sub> (one signal is overlapping with DMSO, see HSQC) and the quaternary triazole carbon atoms is observed in the <sup>13</sup>C NMR spectrum.



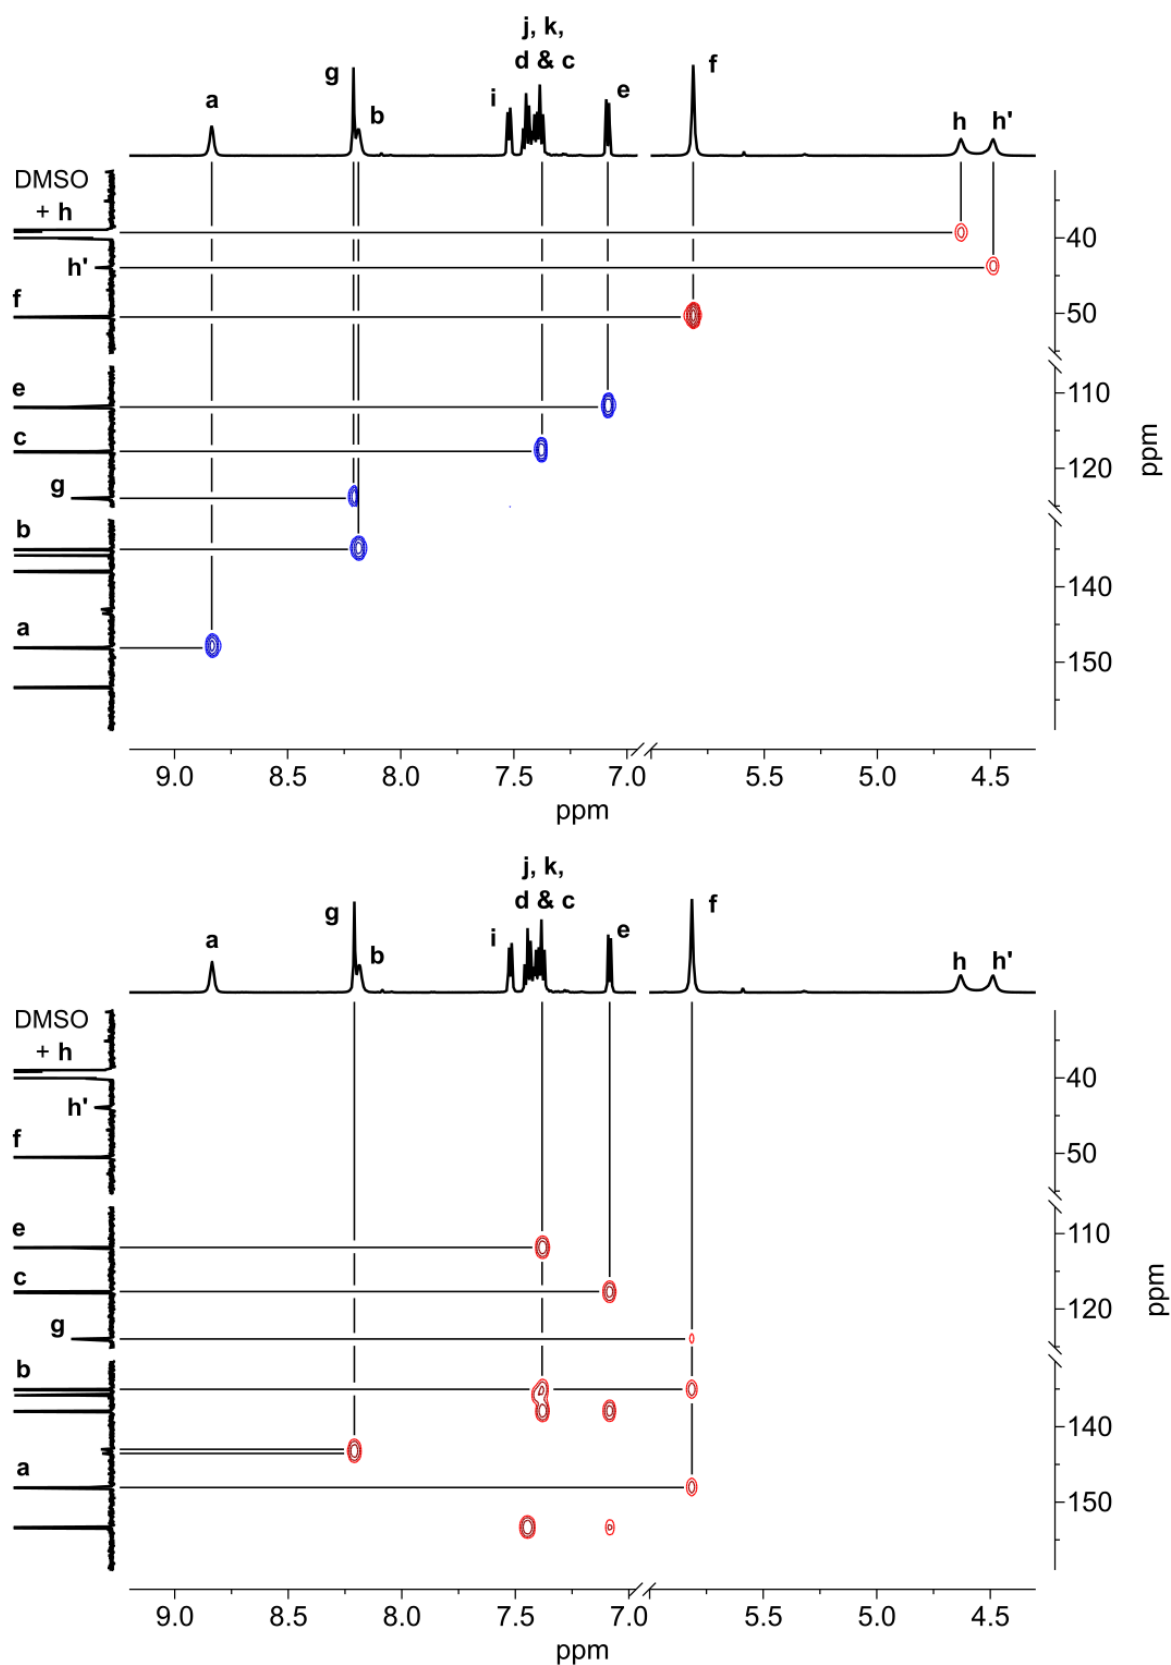

**Figure S2:** Relevant section of the HSQC (top) and HMBC NMR spectrum (bottom) of ligand L-H<sub>2</sub> which is used for signal assignment.

## 2.4. Self-assembly of the charge-neutral $[L_2Zn_2]$ complex

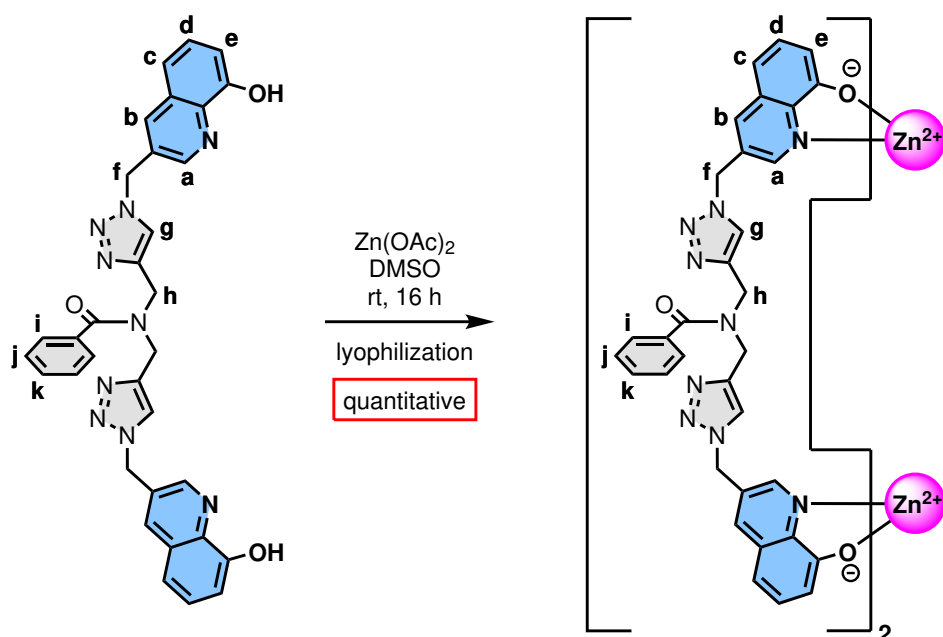

Ligand  $L-H_2$  (1 equiv) and  $Zn(OAc)_2$  (1 equiv) were dissolved in DMSO (500  $\mu$ M). The zinc acetate solution was added to the stirring ligand solution which results in a colour change to yellow. The solution was allowed to stir for 16 h and the solvent as well as the byproduct acetic acid were removed via lyophilization, which yields the complex as a yellow solid. The complex is suspended and washed with MeOH for further purification. The mixture is centrifuged and the solvent is removed by decantation. This cleaning process is repeated twice. The resulting precipitate was again dissolved in DMSO which was removed via lyophilization to yields the clean complex as a yellow solid in a quantitative fashion.

$^1H$  NMR (500 MHz,  $DMSO-d_6$ , 25  $^{\circ}C$ ):  $\delta$  = 8.51 (s, 4H,  $H_b$ ), 7.97 (br., 6H,  $H_a$  and  $H_g$ ), 7.78 (s, 2H,  $H_{g'}$ ), 7.57 (d,  $J$  = 7.2 Hz, 4H,  $H_i$ ), 7.47-7.36 (m, 10H,  $H_d$ ,  $H_j$  and  $H_k$ ), 6.92 (d,  $J$  = 6.9 Hz, 4H,  $H_c$ ), 6.68 (br., 4H,  $H_e$ ), 5.72 (s, 4H,  $H_f$ ), 5.63 (s, 4H,  $H_{f'}$ ), 4.67 (s, 4H,  $H_h$ ), 4.53 (s, 4H,  $H_{h'}$ ) ppm. HRMS (negative ESI-MS, MeCN/DMSO):  $m/z$  = 1357.2493 ( $[M + Cl^-]$ ,  $[(Cl)@L_2Zn_2]^-$ ,  $[(Cl)@C_{33}H_{25}N_9O_3)_2Zn_2]^-$ , calcd. 1357.2408).

Variable temperature  $^1H$  NMR studies (Figure S4) and NOESY as well as COSY measurements (Figure S5) at high temperature were conducted because the signal assignment is hampered at room temperature as a result of the in general broad and partially overlapping signals.

$^1H$  NMR (500 MHz,  $DMSO-d_6$ , 90  $^{\circ}C$ ):  $\delta$  = 8.47 (s, 4H,  $H_b$ ), 8.09 (s, 4H,  $H_a$ ), 7.78 (s, 4H,  $H_g$ ), 7.51 (dd,  $J$  = 8.0, 1.4 Hz, 4H,  $H_i$ ), 7.44-7.36 (m, 10H,  $H_d$ ,  $H_j$  and  $H_k$ ), 6.93 (d, 7.9 Hz, 4H,  $H_c$ ), 6.76 (d, 7.8 Hz, 4H,  $H_e$ ), 5.66 (s, 8H,  $H_f$ ), 4.63 (s, 8H,  $H_h$ ) ppm.

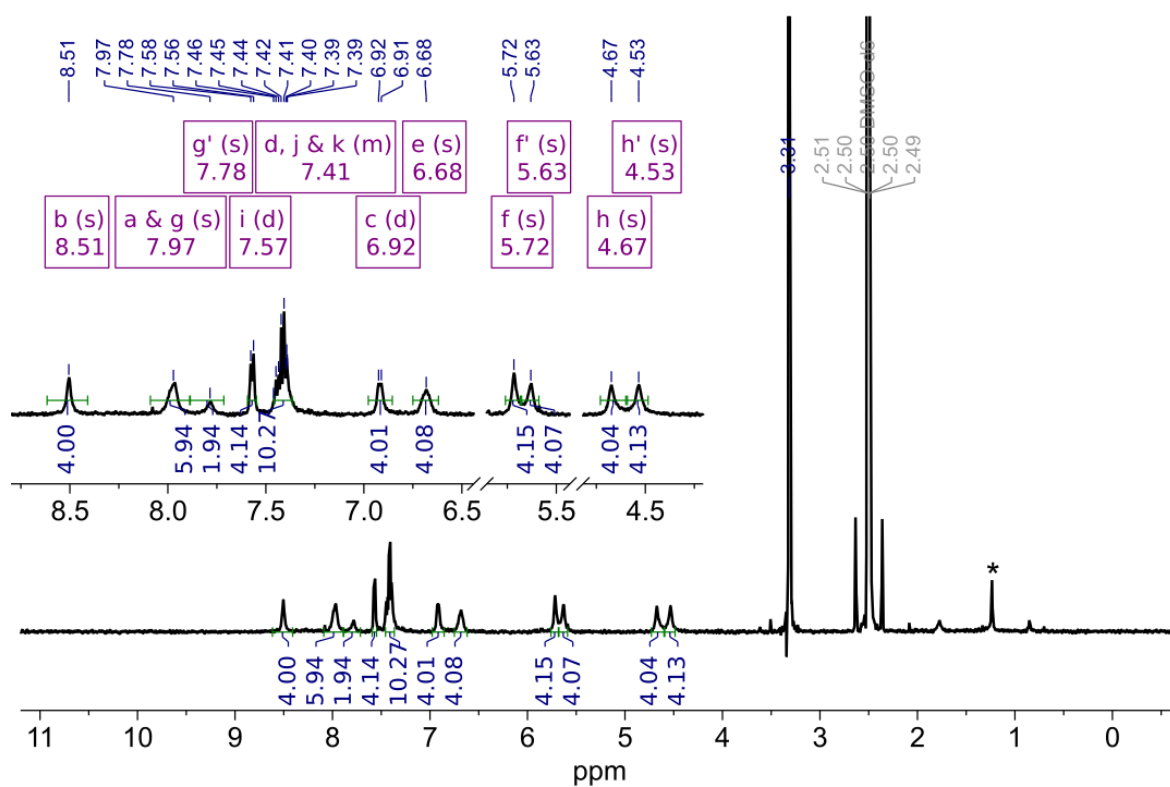

**Figure S3:**  $^1\text{H}$  NMR of  $[\text{L}_2\text{Zn}_2]$  in  $\text{DMSO-}d_6$  at  $25^\circ\text{C}$ . The signal labeled with a \* is grease.

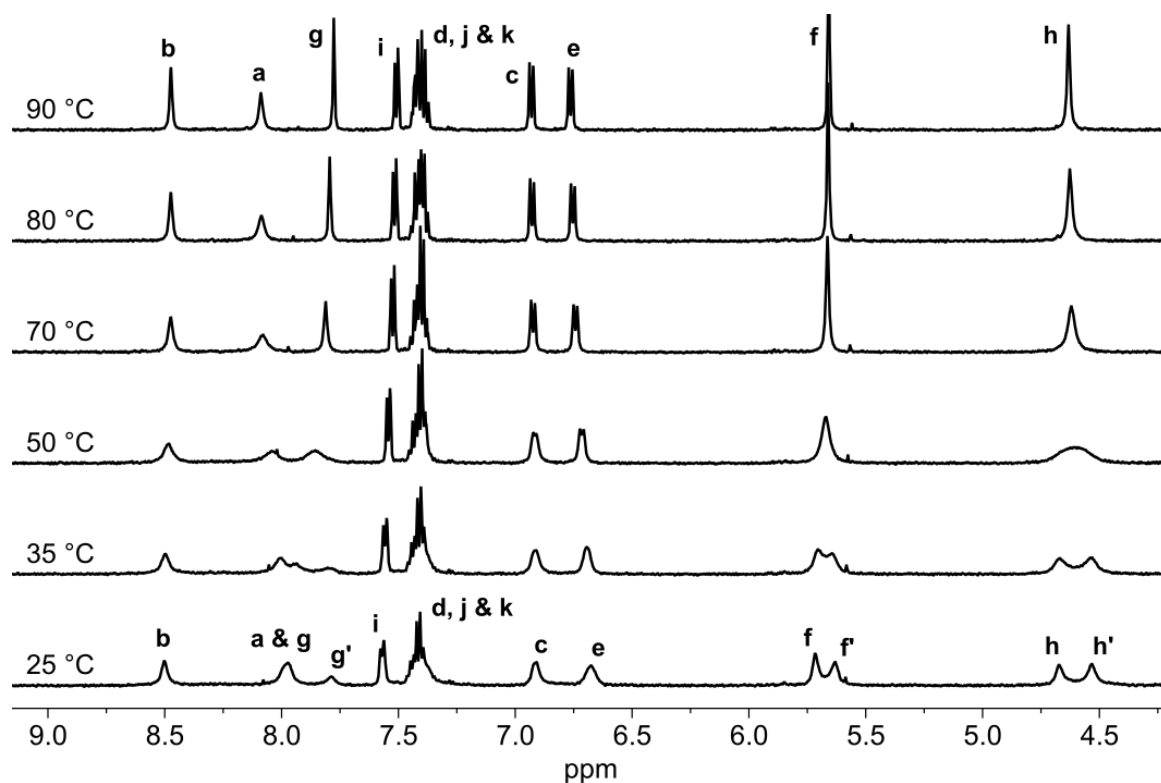

**Figure S4:**  $^1\text{H}$  NMR of  $[\text{L}_2\text{Zn}_2]$  in  $\text{DMSO-}d_6$  at different temperatures ranging from  $25^\circ\text{C}$  to  $90^\circ\text{C}$ .

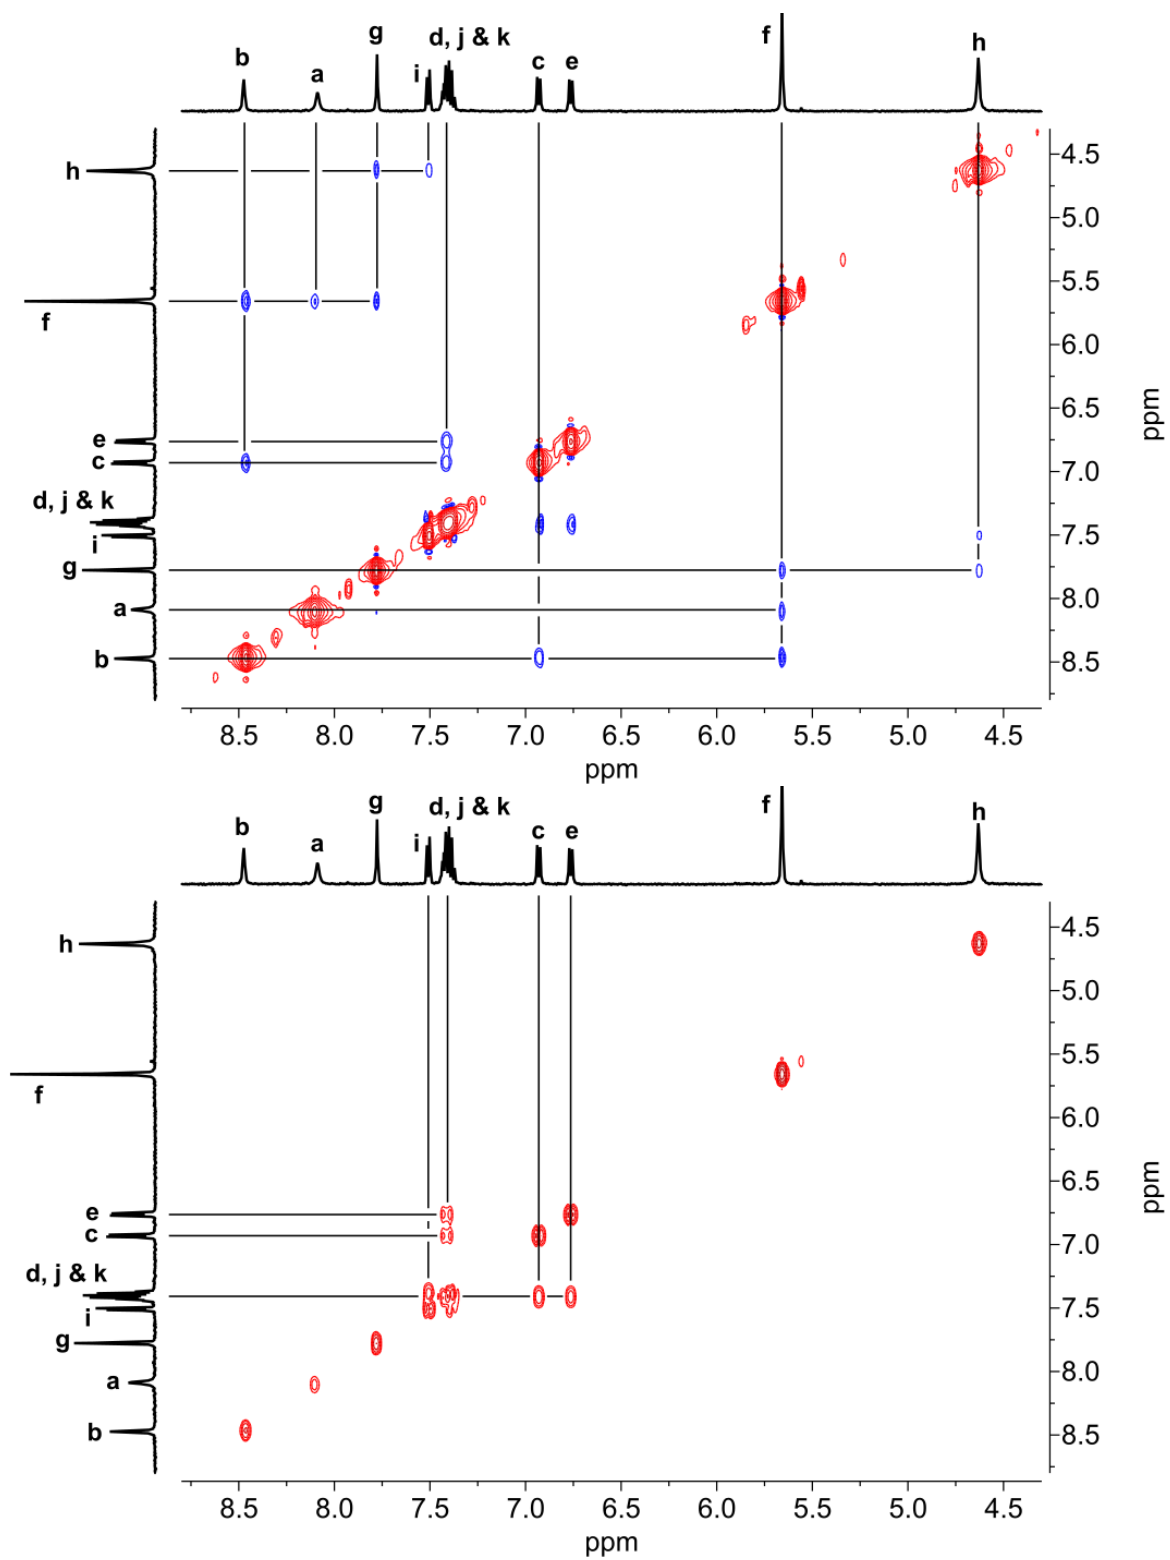

Figure S5: NOESY (top) and COSY (bottom) NMR spectrum of  $[L_2Zn_2]$  in  $DMSO-d_6$  at  $90^\circ C$ .

### 3. Anion binding studies

#### 3.1. Procedures

##### Deprotonation of dicarboxylic acids

Oxalic, malonic, succinic, glutaric and adipic acid were commercially obtained from chemPUR and Merck (Sigma–Aldrich). The dicarboxylic acids were dissolved in a small amount of methanol (up to 5 mL) and two equivalents of tetrabutylammonium hydroxid (1 M in MeOH) was added to deprotonate the acids. Afterwards, the mixture was vortexed for 30 min. MeOH was removed under reduced pressure after the mixing time. A small amount of water (1–2 mL) was added to the remaining slurry to assist the final lyophilizations process since the available device is not rated for pure methanol (too low melting point). The tetrabutylammonium (TBA) dicarboxylates were used without further workup after several days of lyophilization.

##### Titration procedure

All binding studies were performed dilution corrected. Binding constants for monocarboxylates (acetate and benzoate) were determined by  $^1\text{H}$  NMR titrations since a fast-exchange behavior is found for these guests. The obtained data was fitted by BindFit.<sup>[5,6,7]</sup> The binding constant for oxalate was obtained by performing UV–vis titrations (Hellma 10 mm x 10 mm QS cuvettes, room temperature) because of the intermediate-like exchange behavior in the NMR. Therefore, the absorbance between 290 nm and 550 nm was fitted globally with the program HypSpec2014.<sup>[8]</sup> Errors were estimated by repeating the NMR and UV–vis titration experiments three times.

##### Overview of determined binding constants

**Table S1:** Binding data for  $[\text{L}_2\text{Zn}_2]$  with acetate, benzoate and oxalate.

| guest (TBA salt)                           | iteration | log $K_{1:1}$ | average log $K_{1:1}$ | %error (standard deviation) |
|--------------------------------------------|-----------|---------------|-----------------------|-----------------------------|
| acetate ( $\text{AcO}^-$ ) <sup>a</sup>    | 1         | 3.41          | 3.44                  | $\pm 0.34$                  |
|                                            | 2         | 3.80          |                       |                             |
|                                            | 3         | 3.12          |                       |                             |
| benzoate ( $\text{BzO}^-$ ) <sup>a</sup>   | 1         | 3.50          | 3.33                  | $\pm 0.19$                  |
|                                            | 2         | 3.36          |                       |                             |
|                                            | 3         | 3.13          |                       |                             |
| oxalate ( $\text{C}_2^{2-}$ ) <sup>b</sup> | 1         | 4.36          | 4.39                  | $\pm 0.04$                  |
|                                            | 2         | 4.44          |                       |                             |
|                                            | 3         | 4.37          |                       |                             |

Binding constants determined by (a)  $^1\text{H}$  NMR titrations with BindFit<sup>[5,6,7]</sup> and (b) UV–vis titrations with HypSpec2014.<sup>[8]</sup>

### 3.2. Acetate

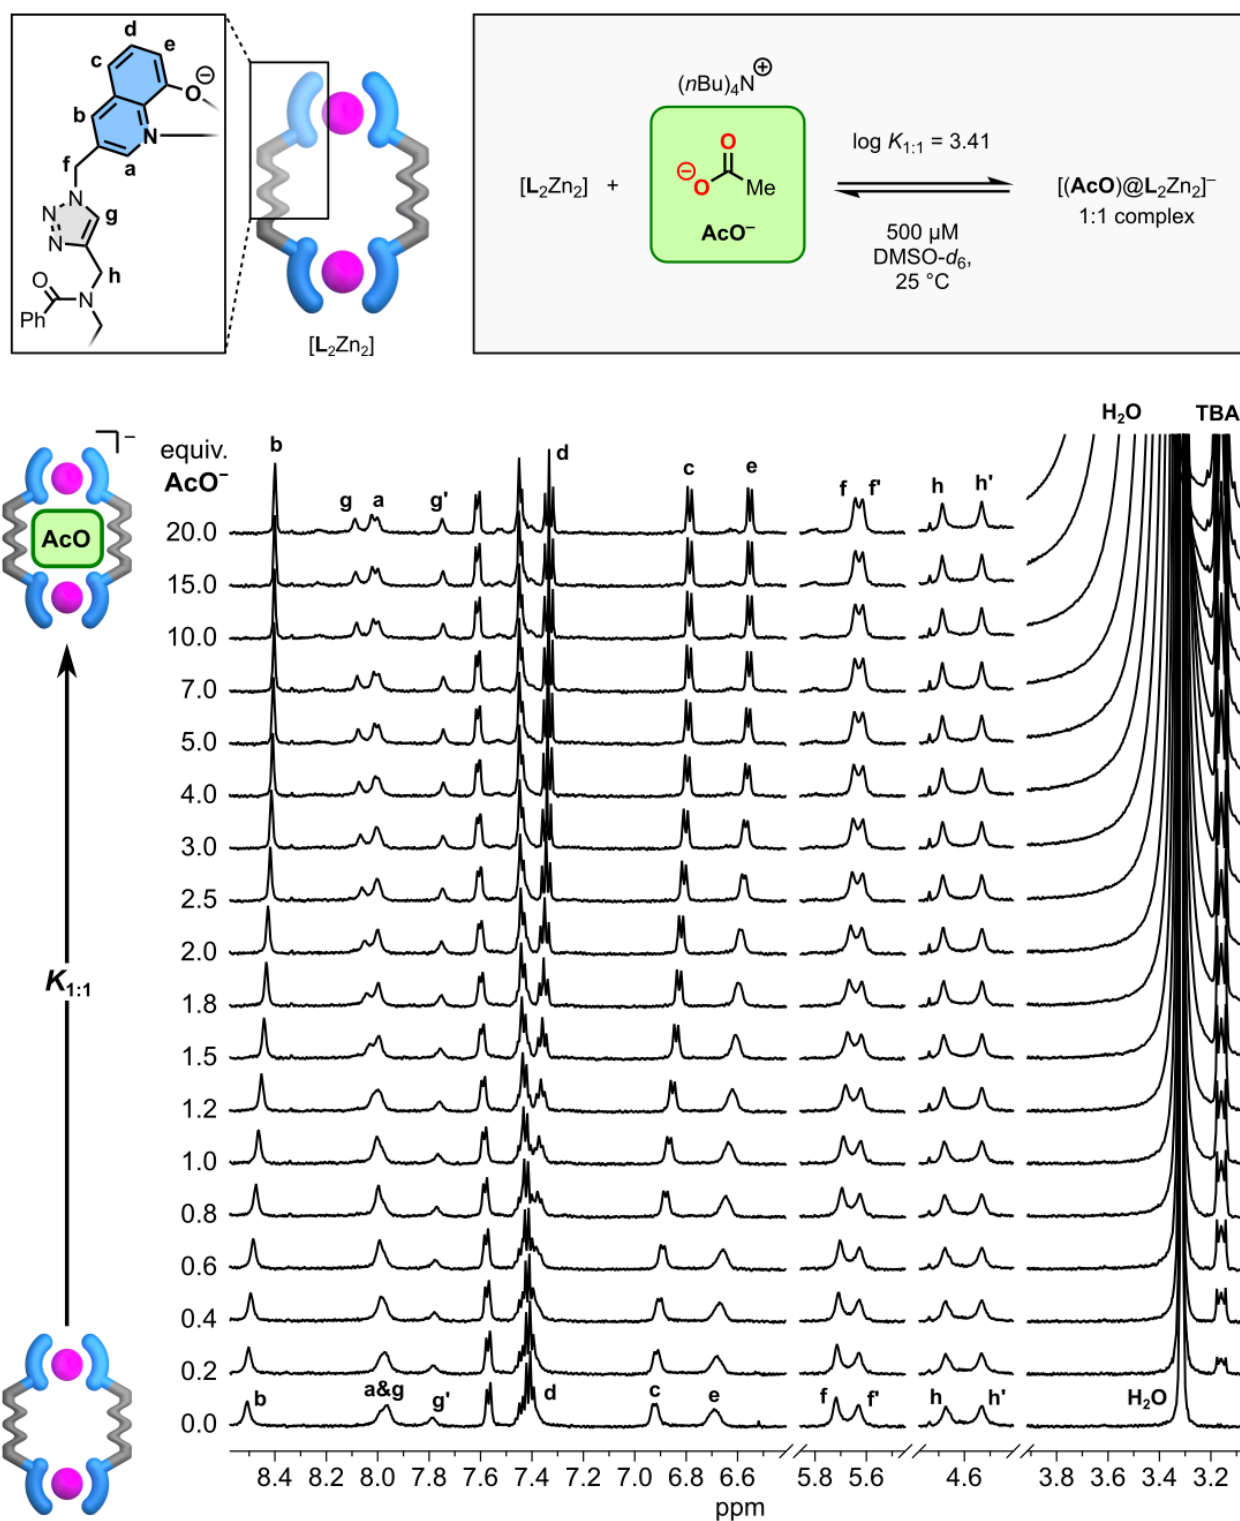

**Figure S6:**  $^1\text{H}$  NMR titration (500 MHz, 500  $\mu\text{M}$ ,  $\text{DMSO-}d_6$ ,  $25^\circ\text{C}$ ) of  $[\text{L}_2\text{Zn}_2]$  with tetrabutylammonium acetate ( $\text{AcO}^-$ ).

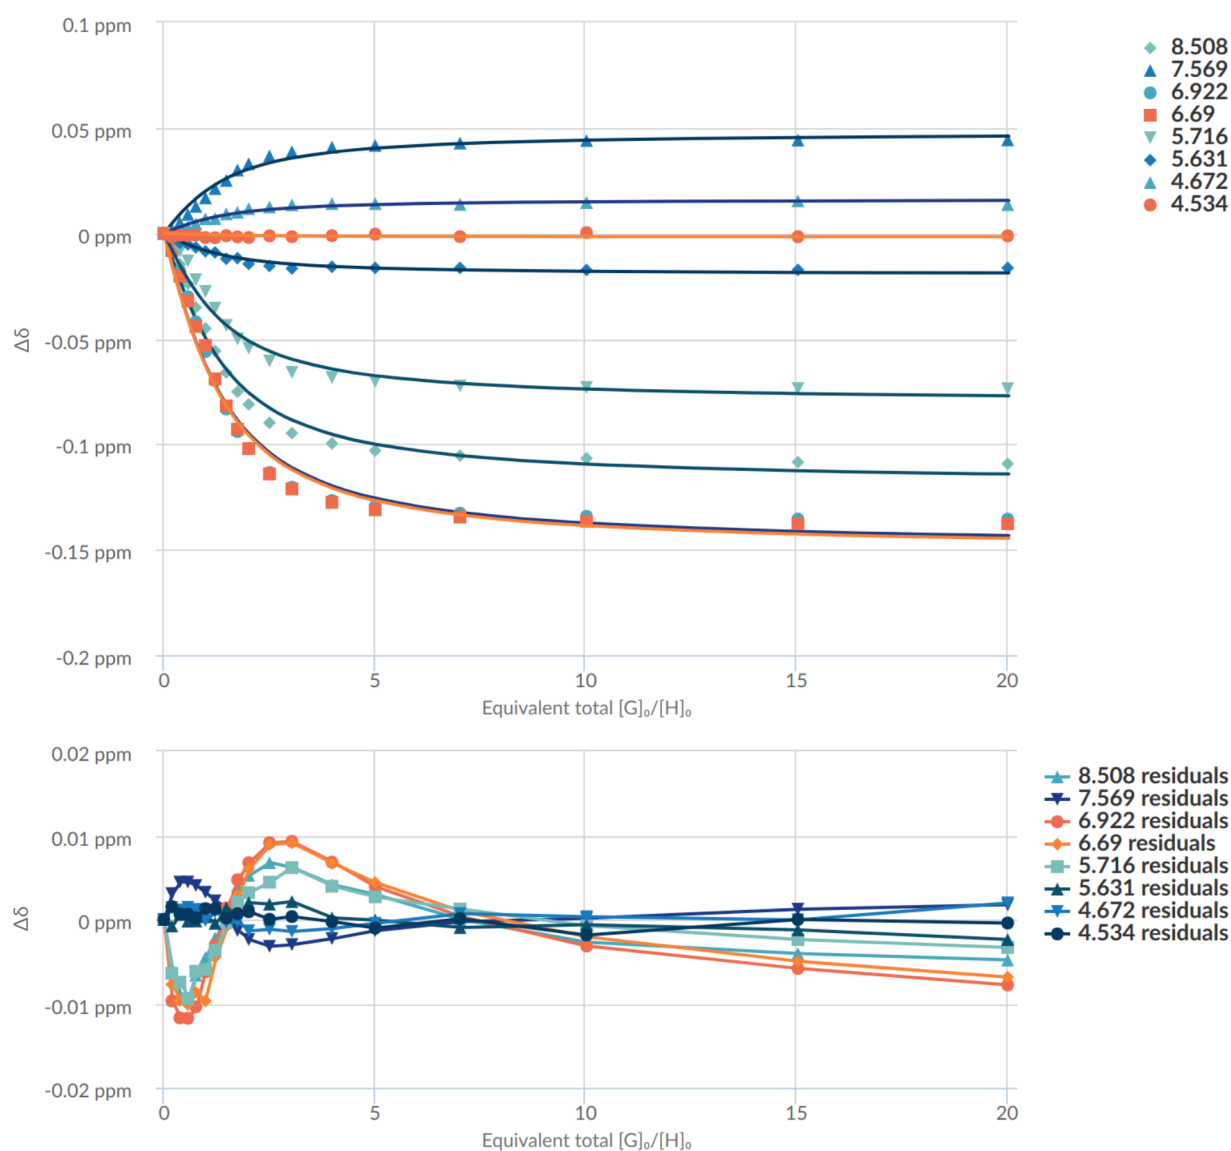

| Parameter<br>(bounds)      | Optimised | Error        | Initial  |
|----------------------------|-----------|--------------|----------|
| $K (0 \rightarrow \infty)$ | 2553.31   | $\pm 5.7772$ | 100.00   |
|                            | $M^{-1}$  | %            | $M^{-1}$ |

**Figure S7:** Analysis of the titration data from Figure S6 and determination of the binding constant of  $\text{AcO}^-$  with BindFit. The lack of inflection points is an indication for the formation of a 1:1 host-guest complex.



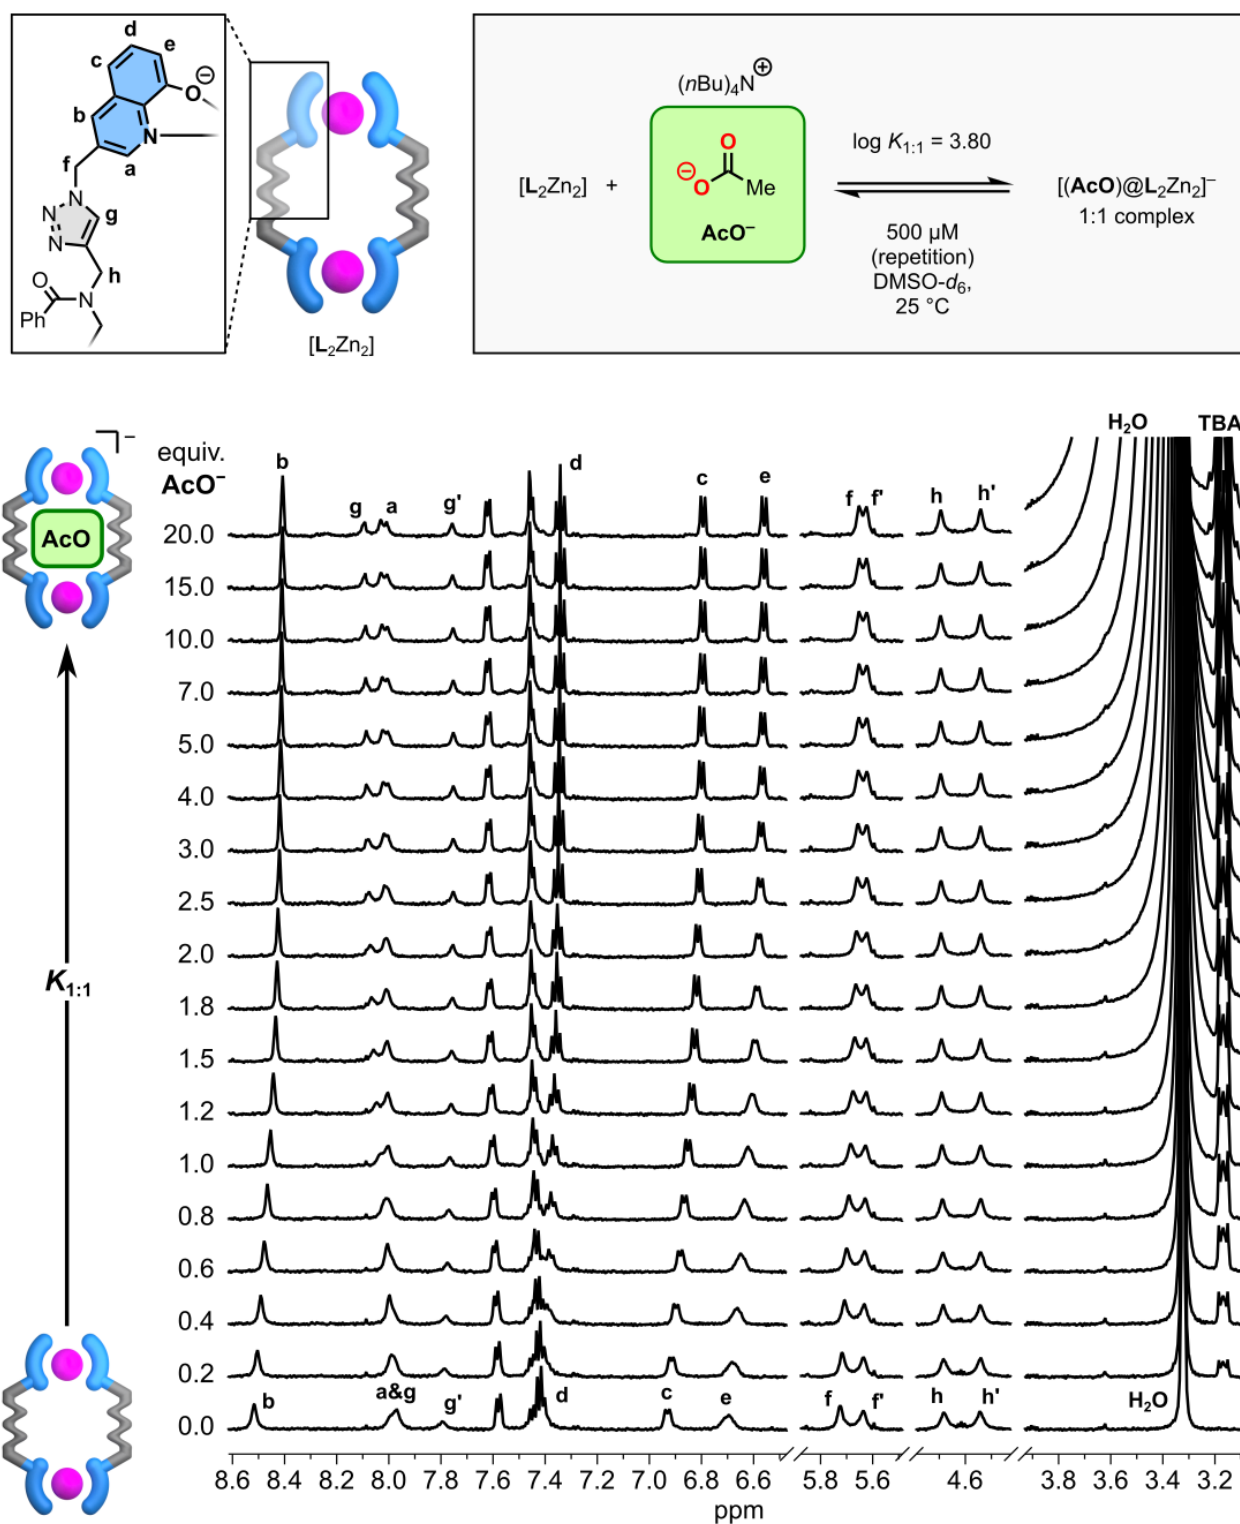

**Figure S8:** Repetition of the  $^1H$  NMR titration of  $[L_2Zn_2]$  with  $AcO^-$  as TBA salt (500 MHz, 500  $\mu M$ ,  $DMSO-d_6$ , 25  $^{\circ}C$ ).

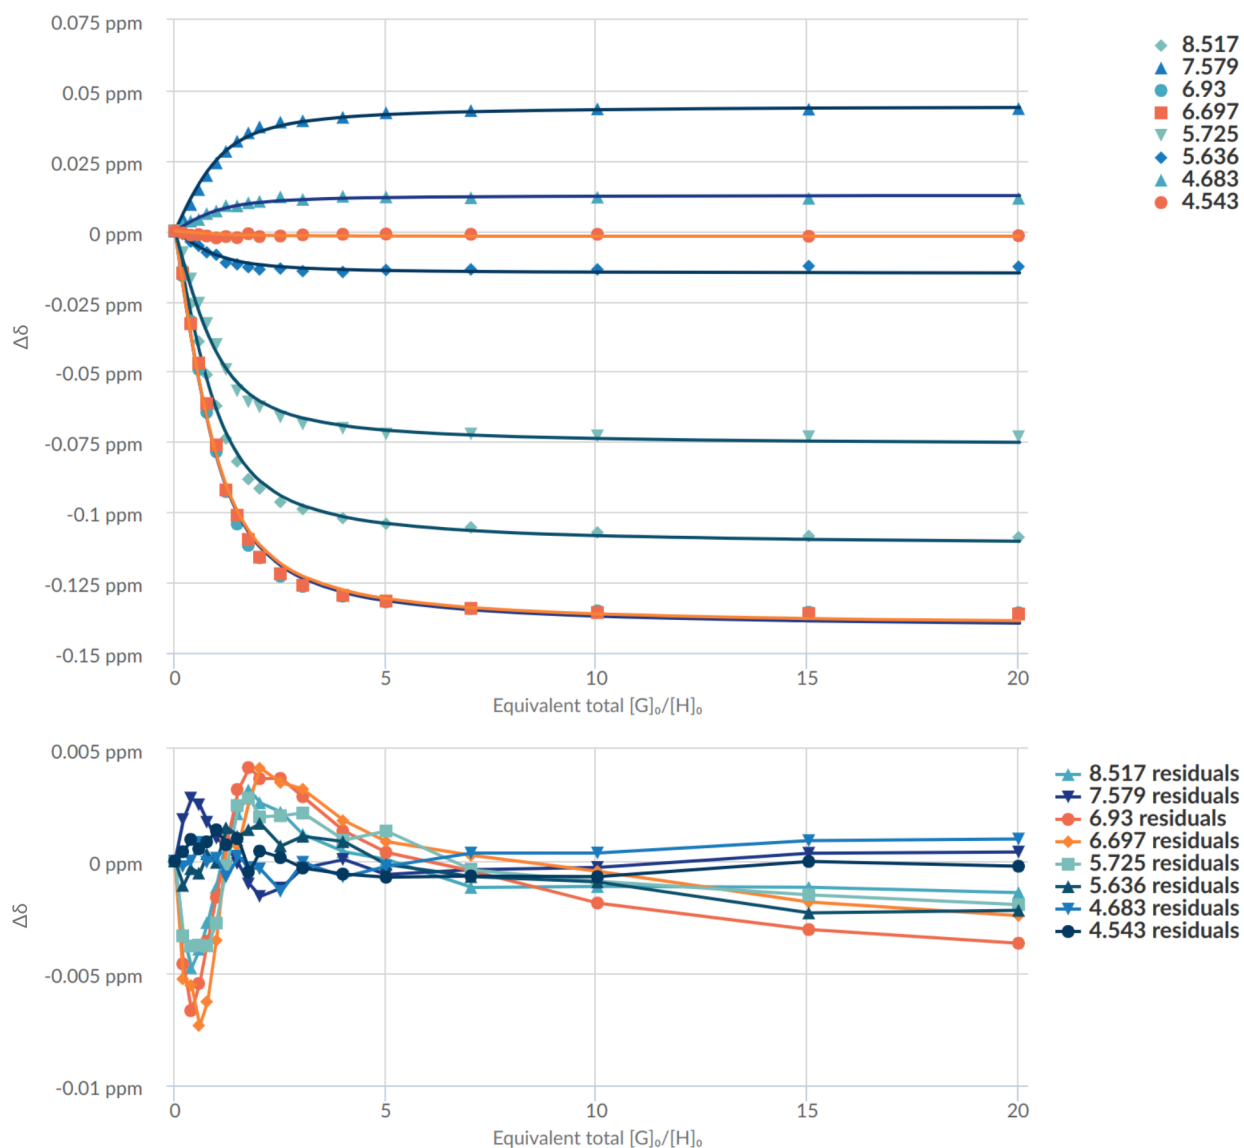

**Figure S9:** Analysis of the titration data from Figure S8 and determination of the binding constant of  $\text{AcO}^-$  with BindFit. Inflection points are not observed.

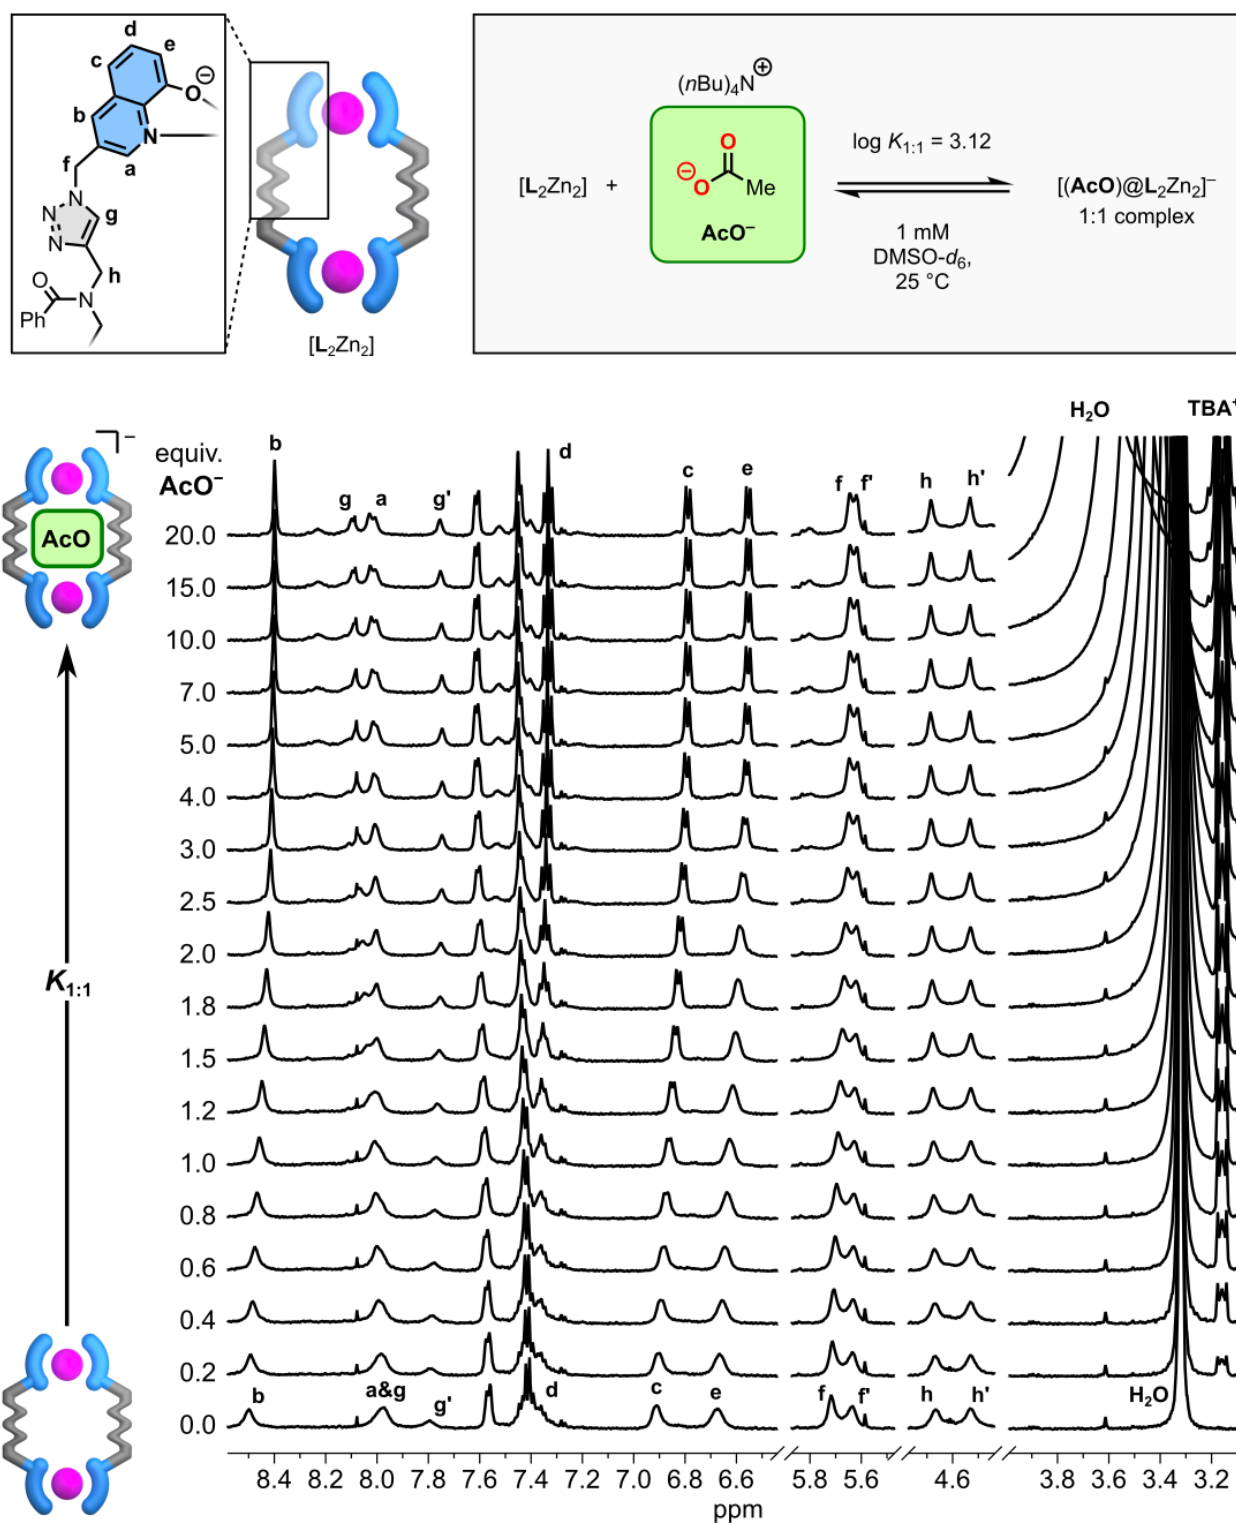

Figure S10:  $^1H$  NMR titration (500 MHz, 1 mM, DMSO- $d_6$ , 25  $^\circ C$ ) of  $[L_2Zn_2]$  with  $AcO^-$  as TBA salt.

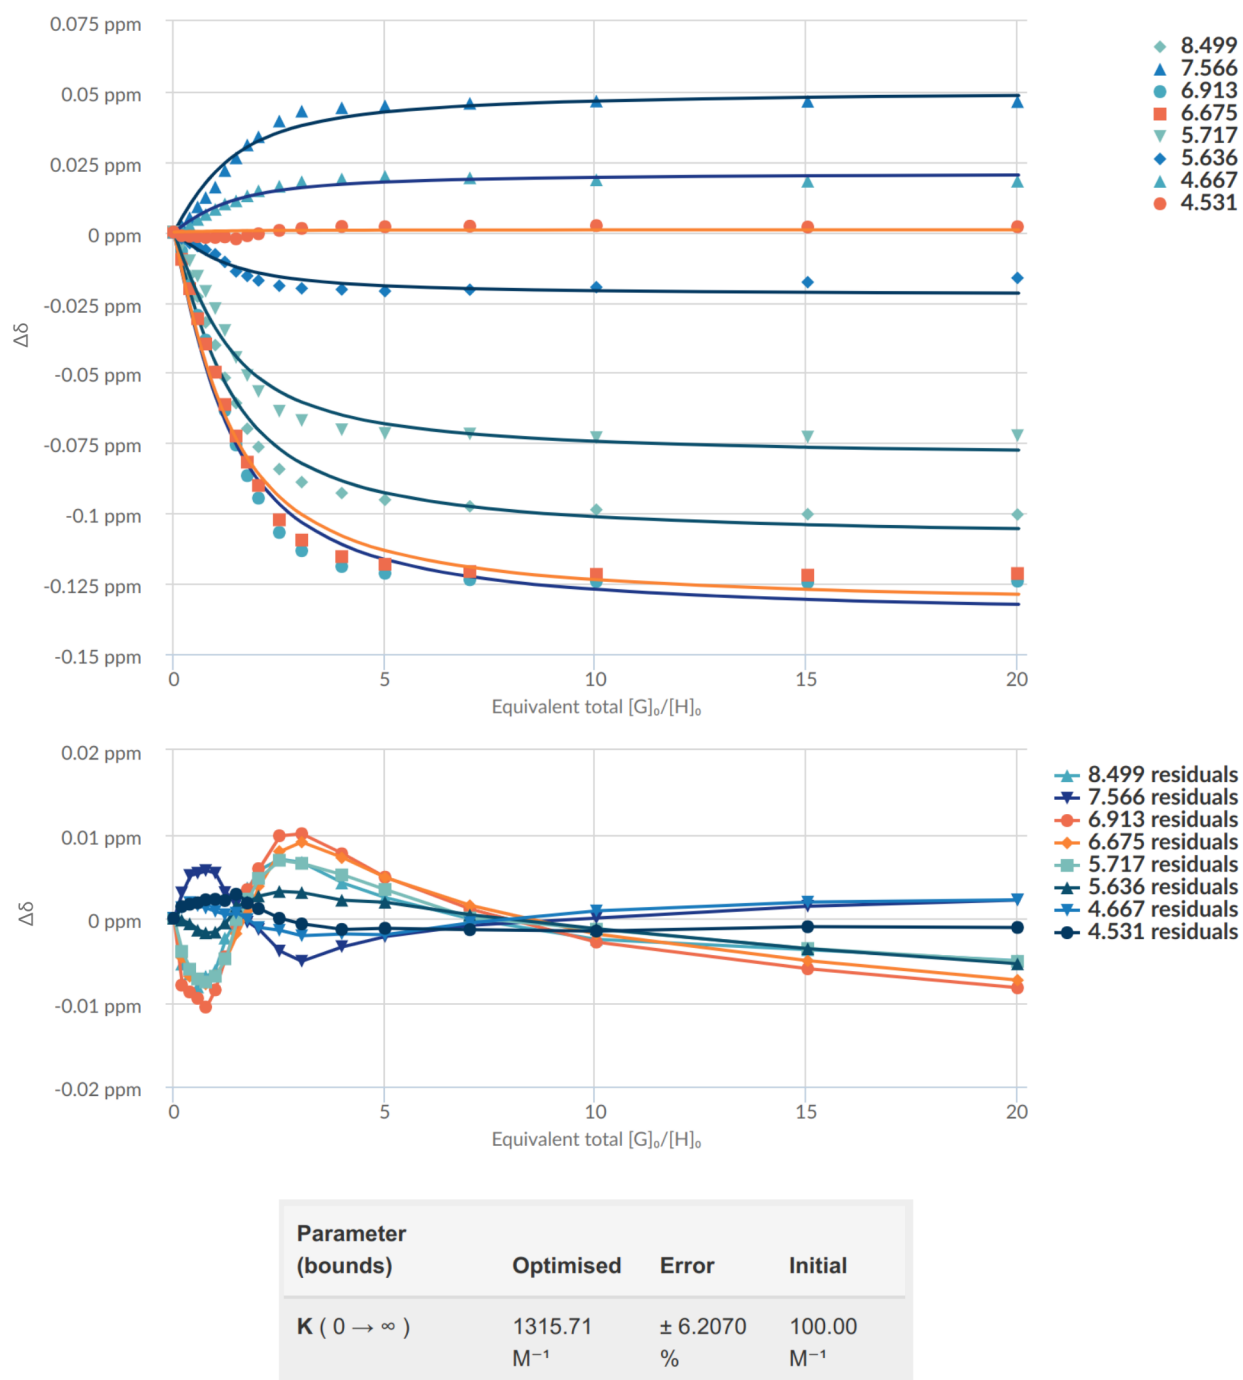

**Figure S11:** Analysis of the titration data from Figure S10 and determination of the binding constant of  $\text{AcO}^-$  with BindFit. Inflection points are again not observed.

### 3.3. Benzoate

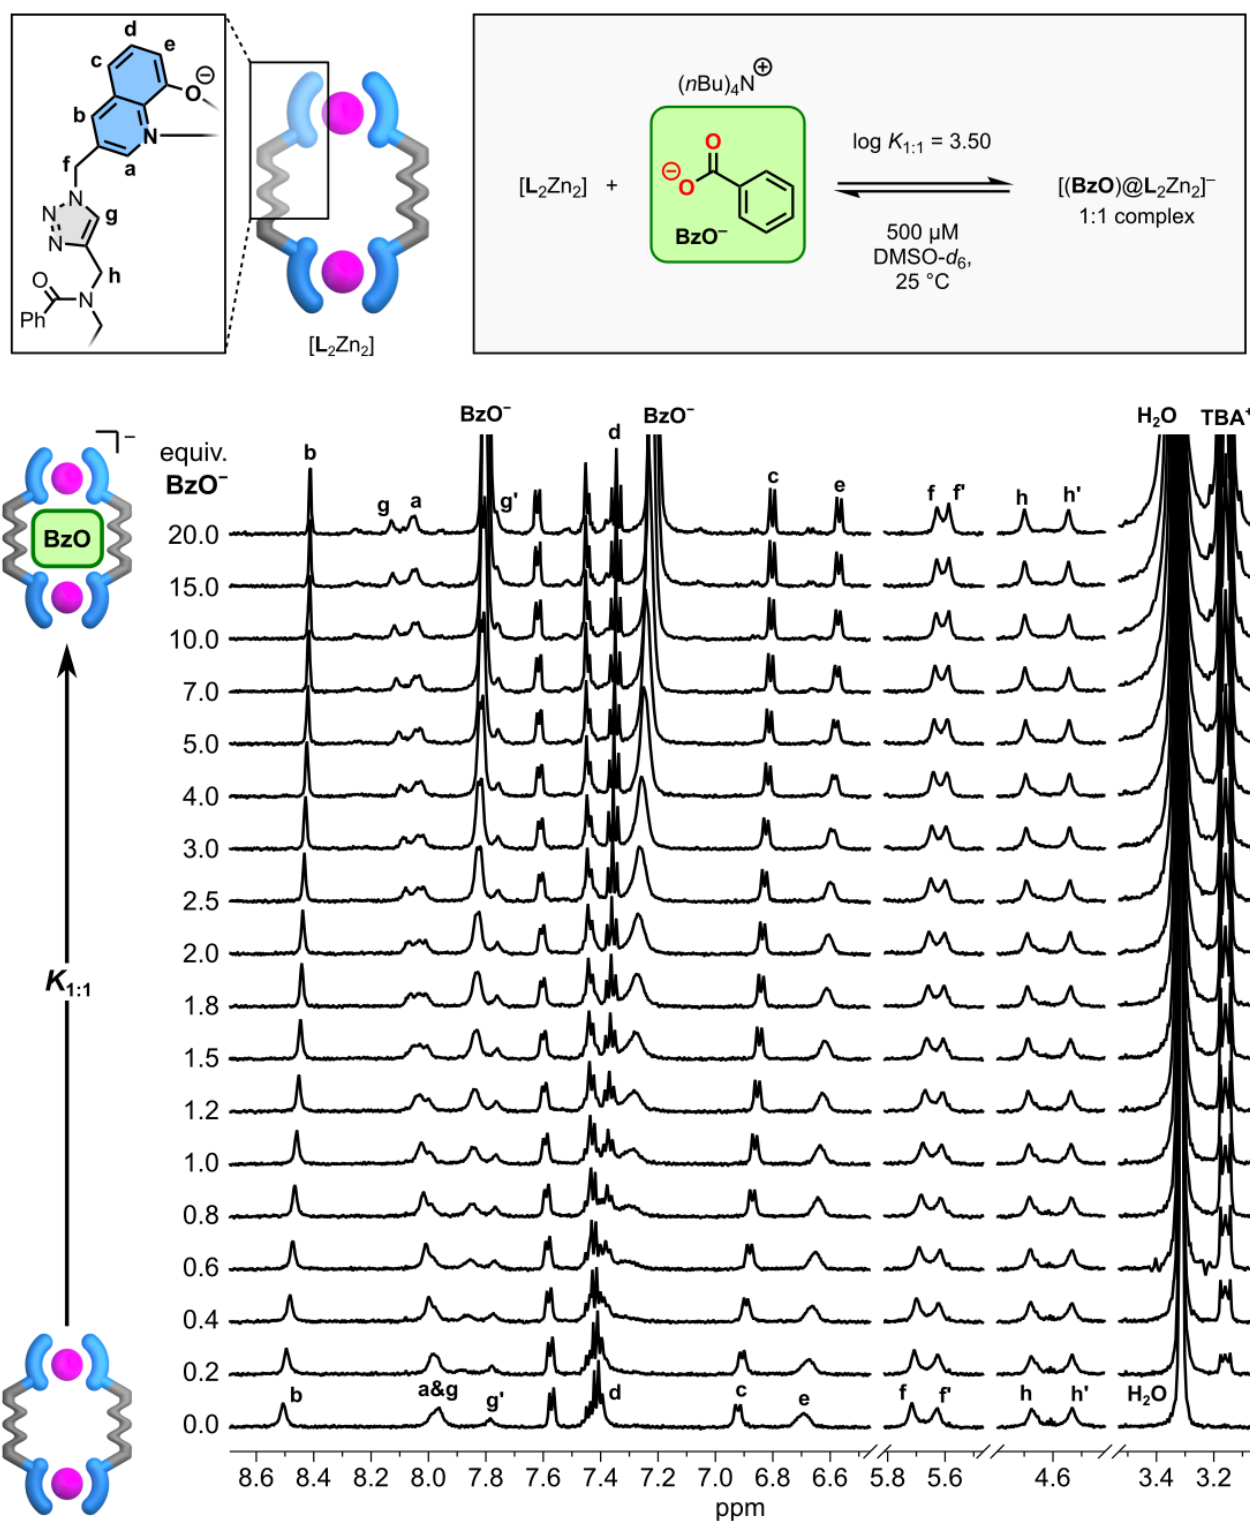

**Figure S12:**  $^1\text{H}$  NMR titration (500 MHz, 500  $\mu\text{M}$ ,  $\text{DMSO}-d_6$ , 25  $^\circ\text{C}$ ) of  $[\text{L}_2\text{Zn}_2]$  with tetrabutylammonium benzoate ( $\text{BzO}^-$ ).

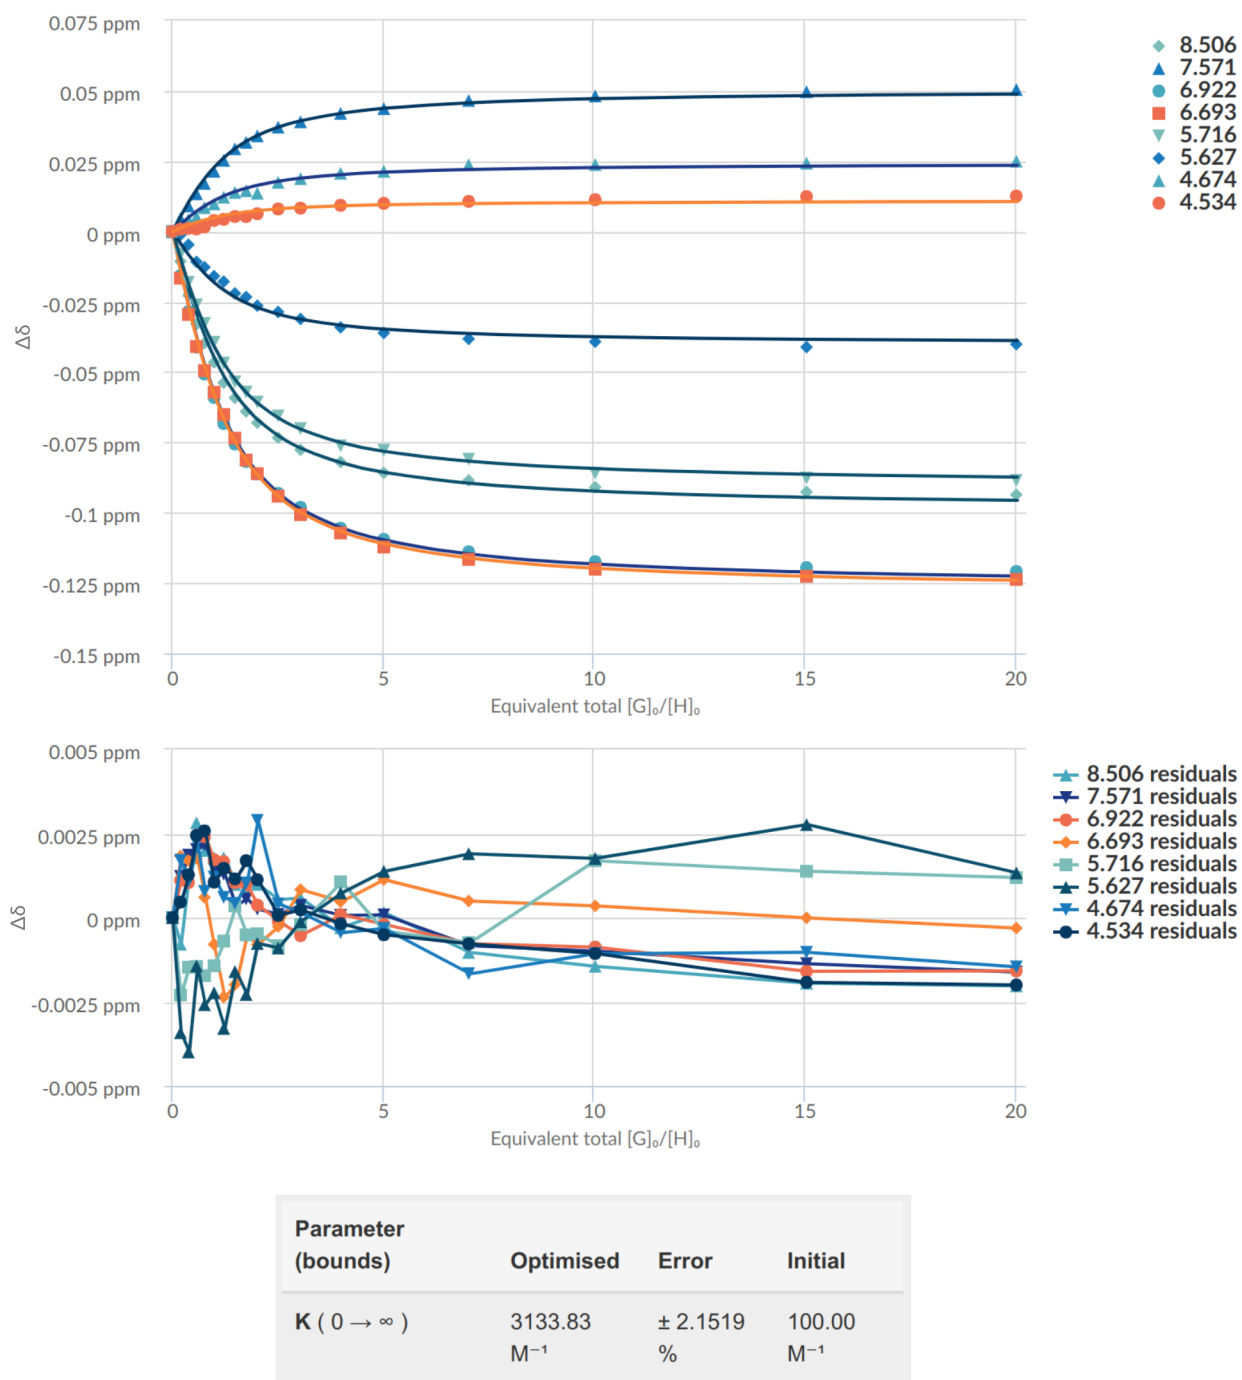

**Figure S13:** Analysis of the titration data from Figure S12 and determination of the binding constant of  $BzO^-$  with BindFit. The lack of inflection points is an indication for the formation of a 1:1 host–guest complex.

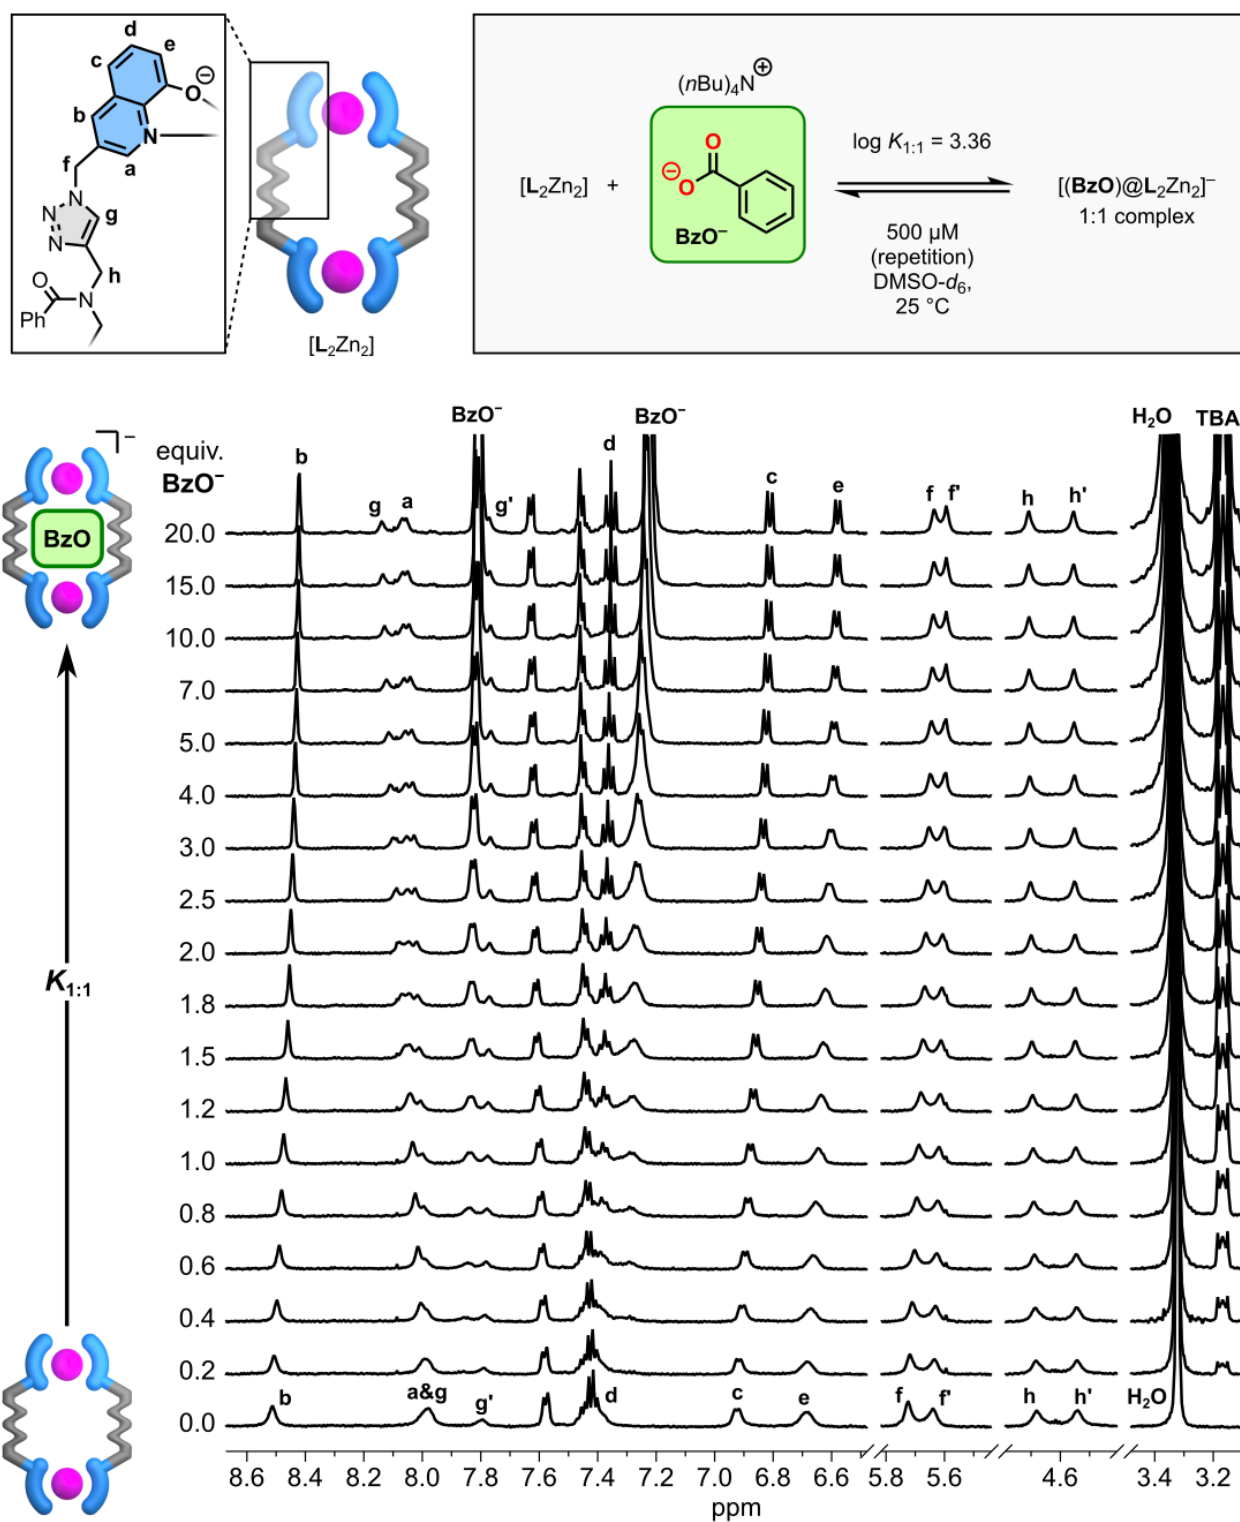

**Figure S14:** Repetition of the  $^1H$  NMR titration of  $[L_2Zn_2]$  with  $BzO^-$  as TBA salt (500 MHz, 500  $\mu M$ , DMSO- $d_6$ , 25  $^{\circ}C$ ).



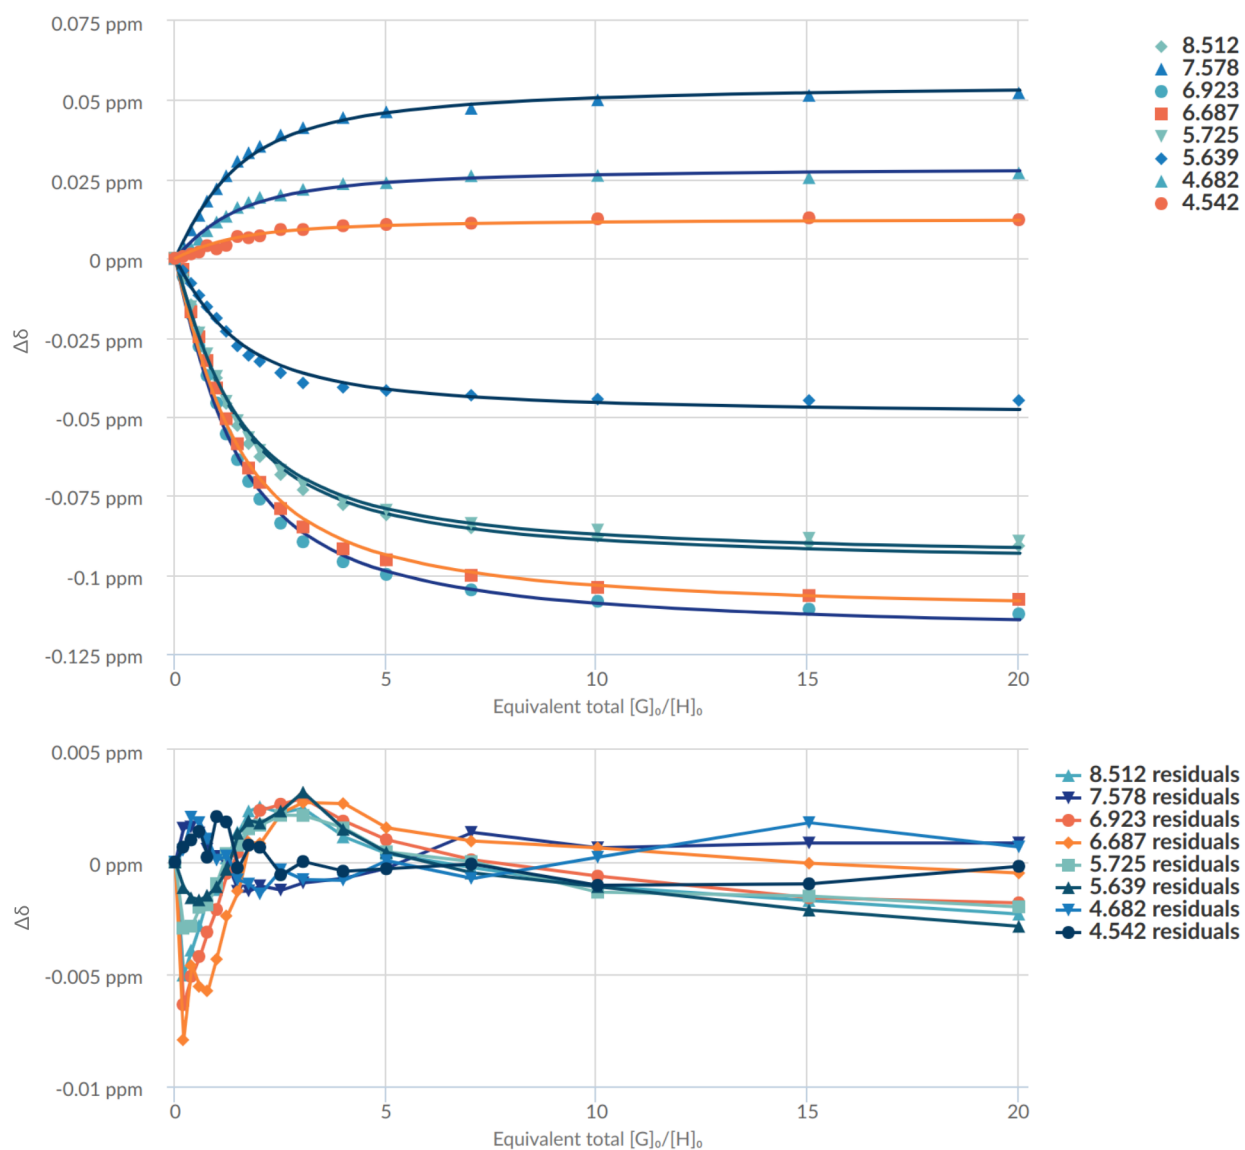

| Parameter<br>(bounds)      | Optimised | Error        | Initial  |
|----------------------------|-----------|--------------|----------|
| $K (0 \rightarrow \infty)$ | 2304.49   | $\pm 2.9269$ | 100.00   |
|                            | $M^{-1}$  | %            | $M^{-1}$ |

**Figure S15:** Analysis of the titration data from Figure S14 and determination of the binding constant of  $BzO^-$  with BindFit. Inflection points are not observed.

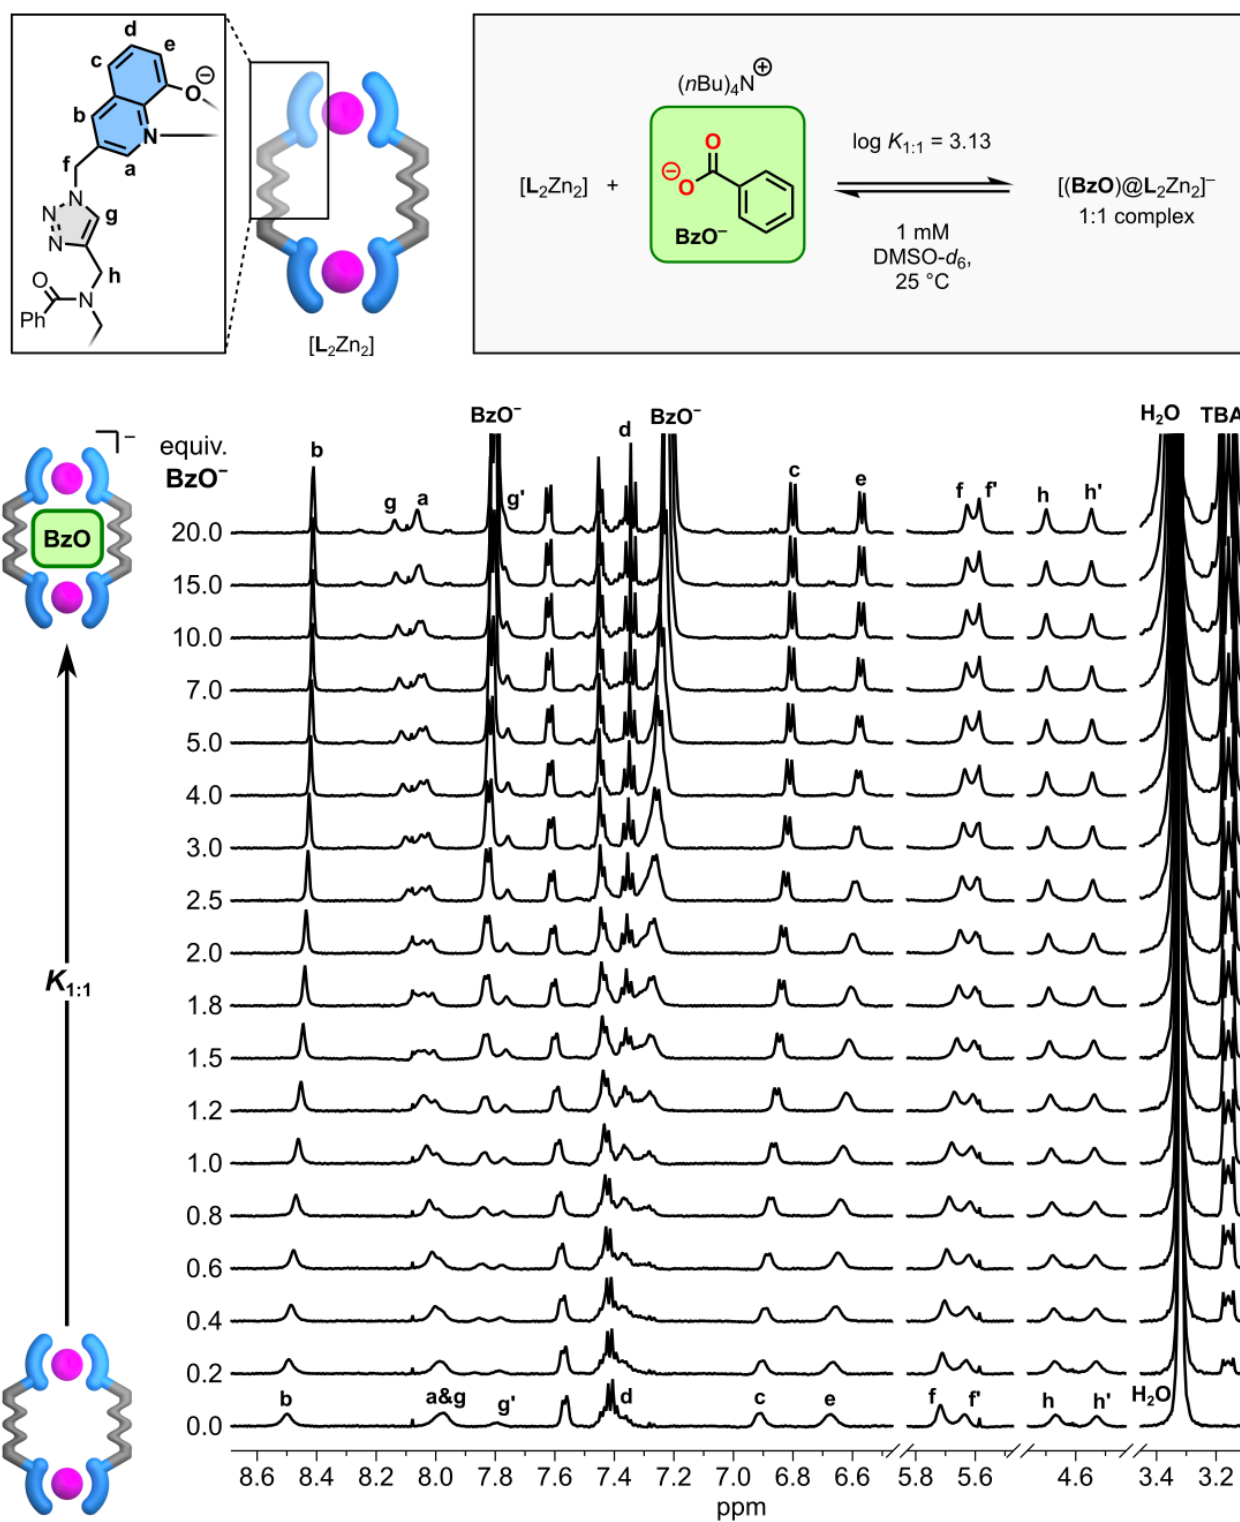

Figure S16:  $^1H$  NMR titration (500 MHz, 1 mM,  $DMSO-d_6$ ,  $25^\circ C$ ) of  $[L_2Zn_2]$  with  $BzO^-$  as TBA salt.

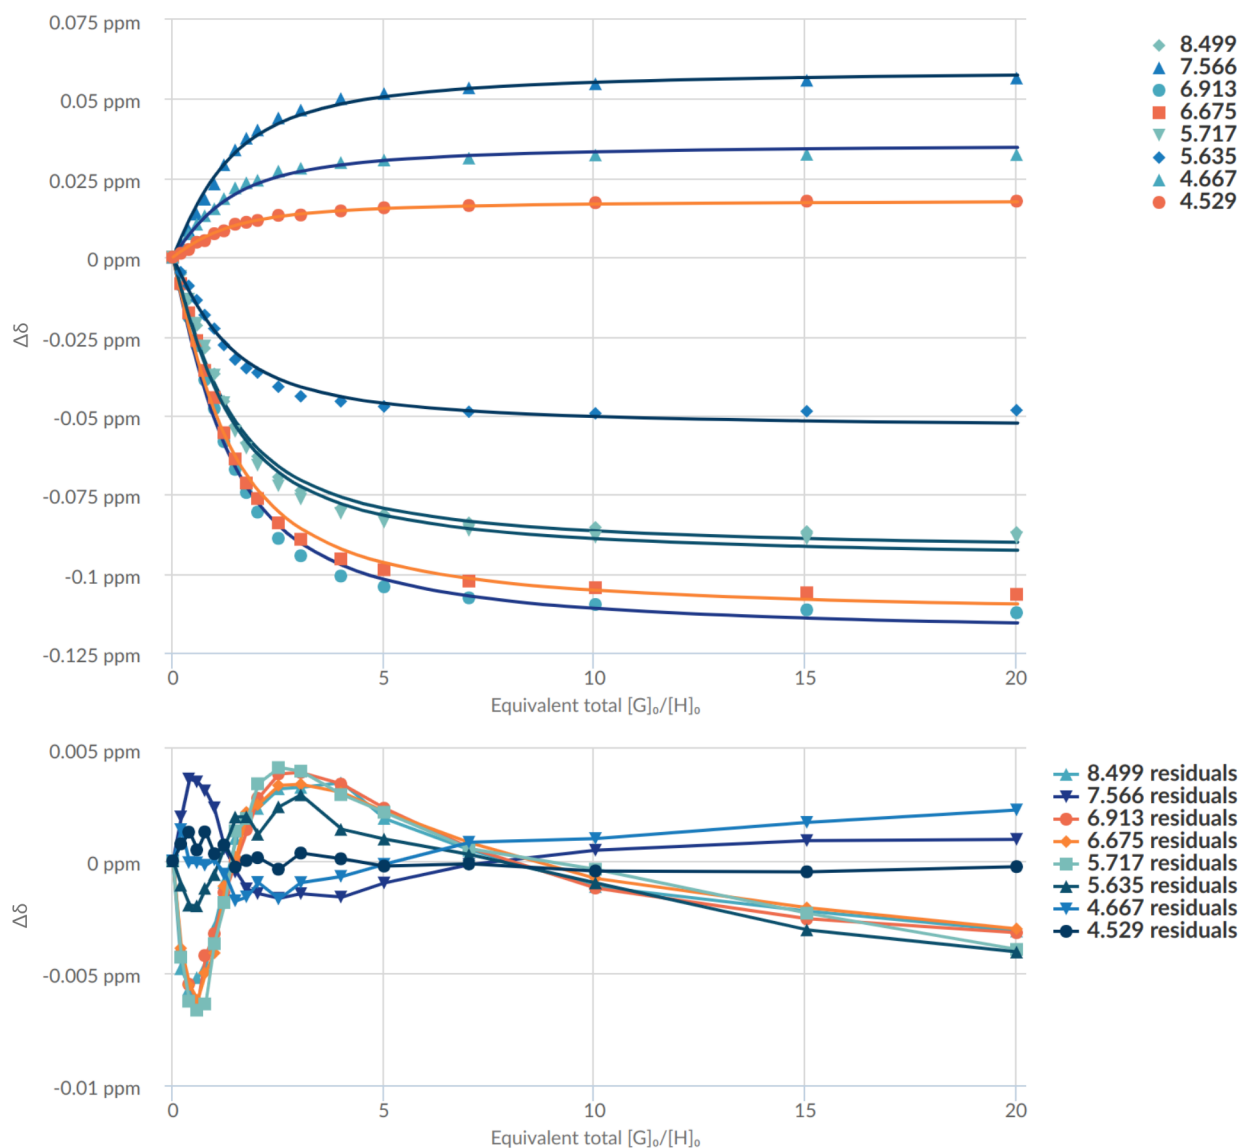

| Parameter<br>(bounds)      | Optimised | Error        | Initial  |
|----------------------------|-----------|--------------|----------|
| $K (0 \rightarrow \infty)$ | 1337.73   | $\pm 3.8996$ | 100.00   |
|                            | $M^{-1}$  | %            | $M^{-1}$ |

**Figure S17:** Analysis of the titration data from Figure S16 and determination of the binding constant of  $BzO^-$  with BindFit. Inflection points are again not observed.

### 3.4. Oxalate

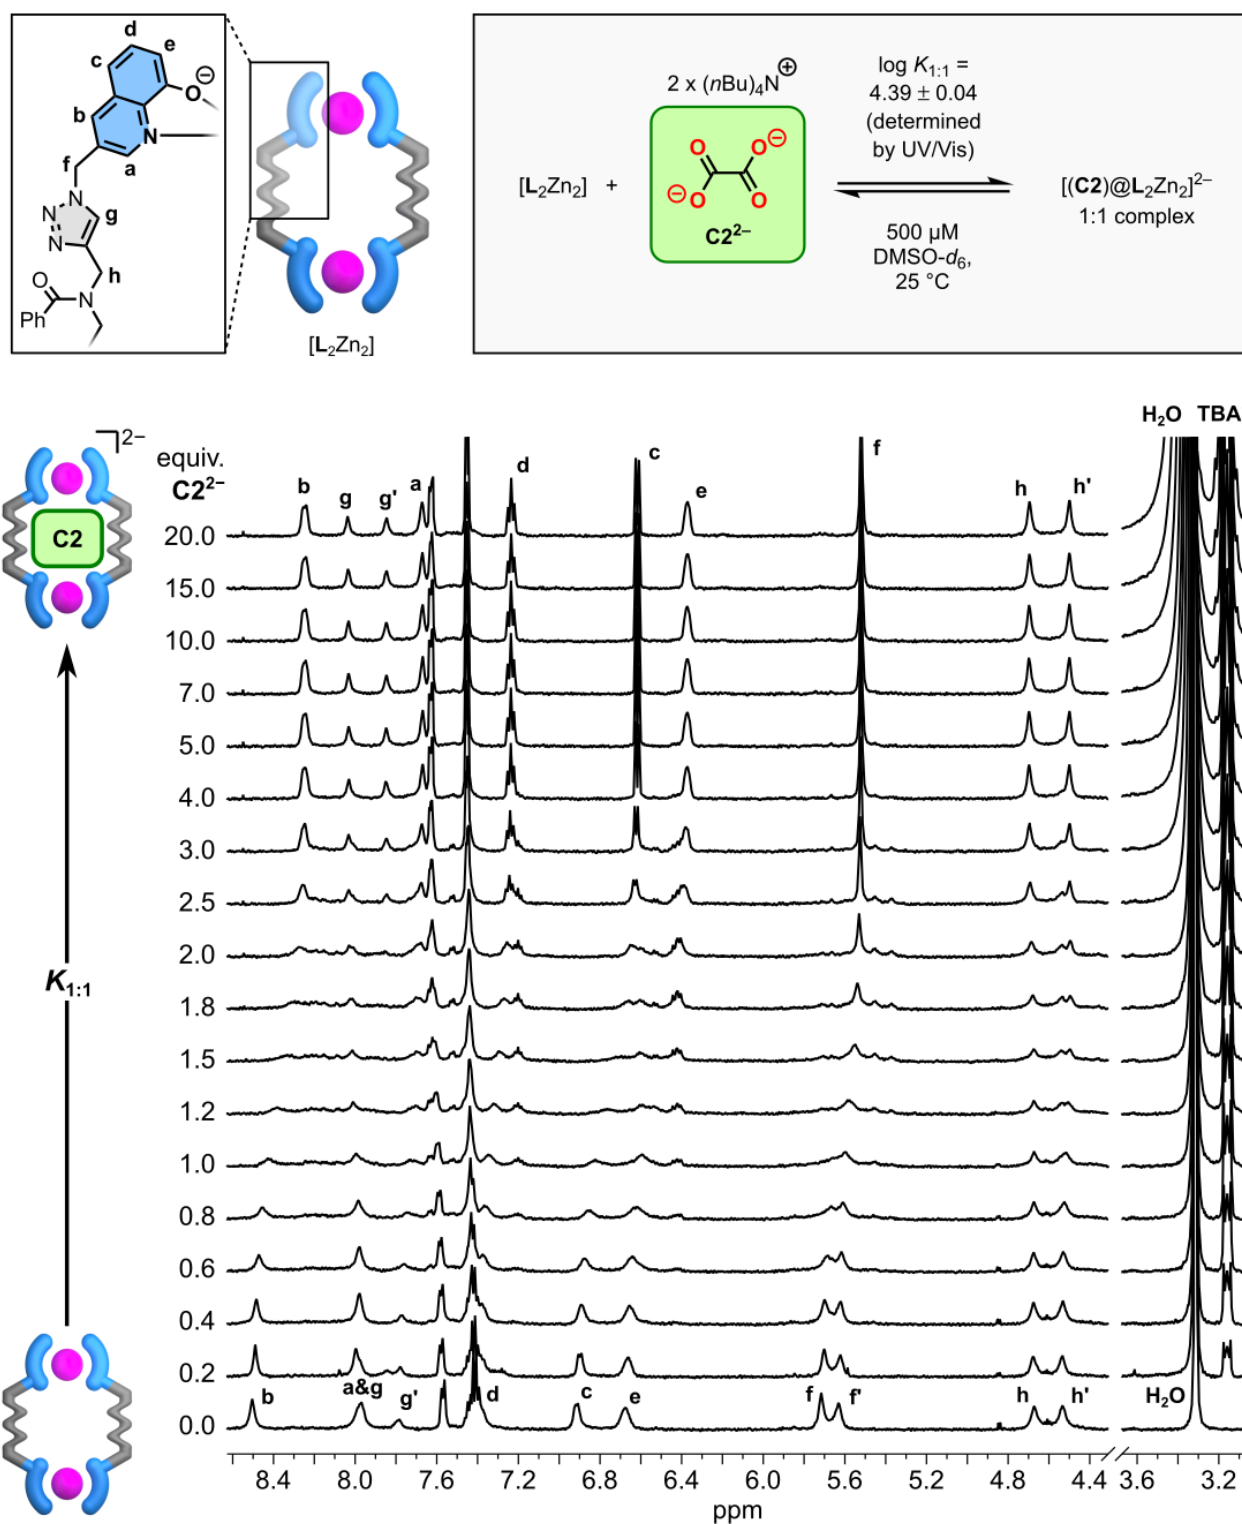

**Figure S18:**  $^1\text{H}$  NMR titration (500 MHz, 500  $\mu\text{M}$ ,  $\text{DMSO-}d_6$ ,  $25^\circ\text{C}$ ) of  $[\text{L}_2\text{Zn}_2]$  with tetrabutylammonium oxalate ( $\text{C}_2^{2-}$ ). Broadening of the signals is observed between one and two equivalents of added guest. The intermediate-like exchange hinders an accurate determination of the binding constants and because of that, UV-vis spectroscopy was used for this task.

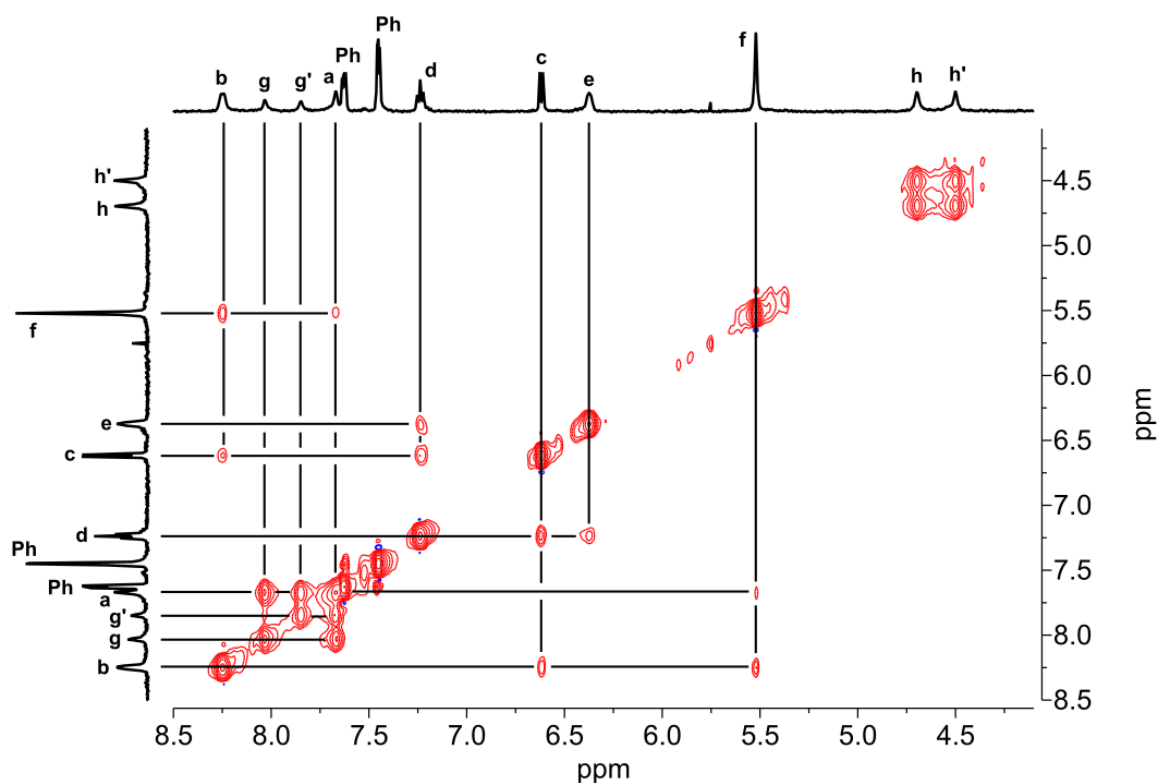

**Figure S19:** NOESY NMR spectrum (500 MHz, 500  $\mu$ M, DMSO- $d_6$ , 25  $^{\circ}$ C) of  $[(C2)@L_2Zn_2]^{2-}$ . The host-guest complex was formed by the addition of 5 equiv. oxalate (TBA salt) to  $[L_2Zn_2]$ .

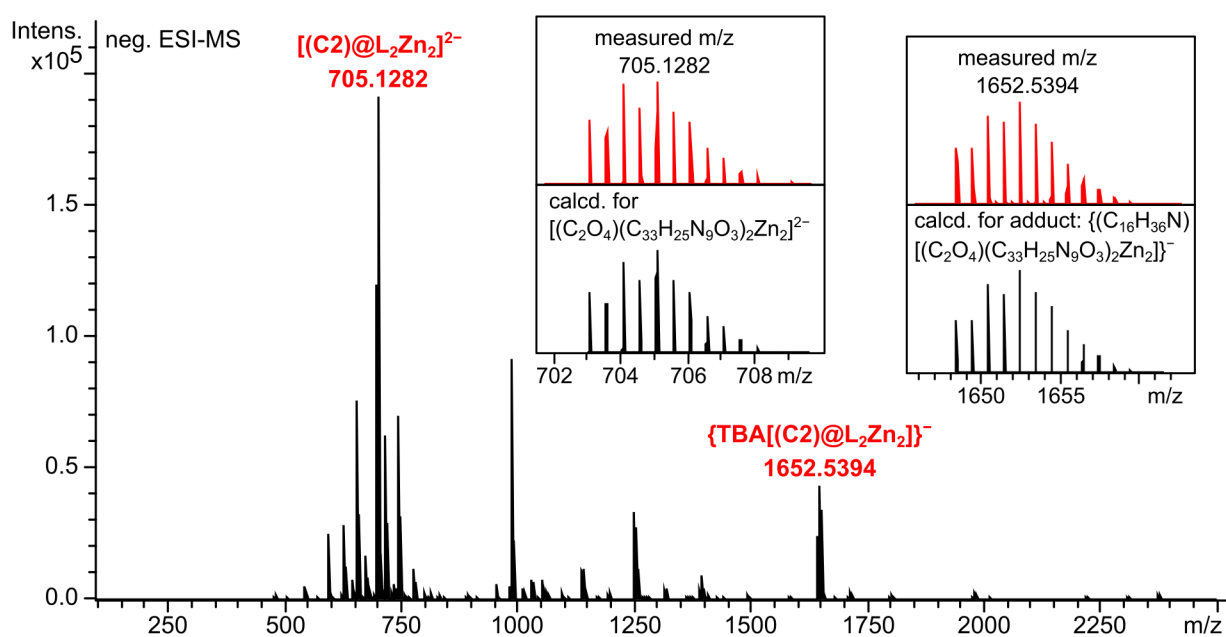

**Figure S20:** ESI-MS spectrum of  $[L_2Zn_2]$  with 5 equiv oxalate as TBA salt. Host and guest were mixed in DMSO before dilution and injection.

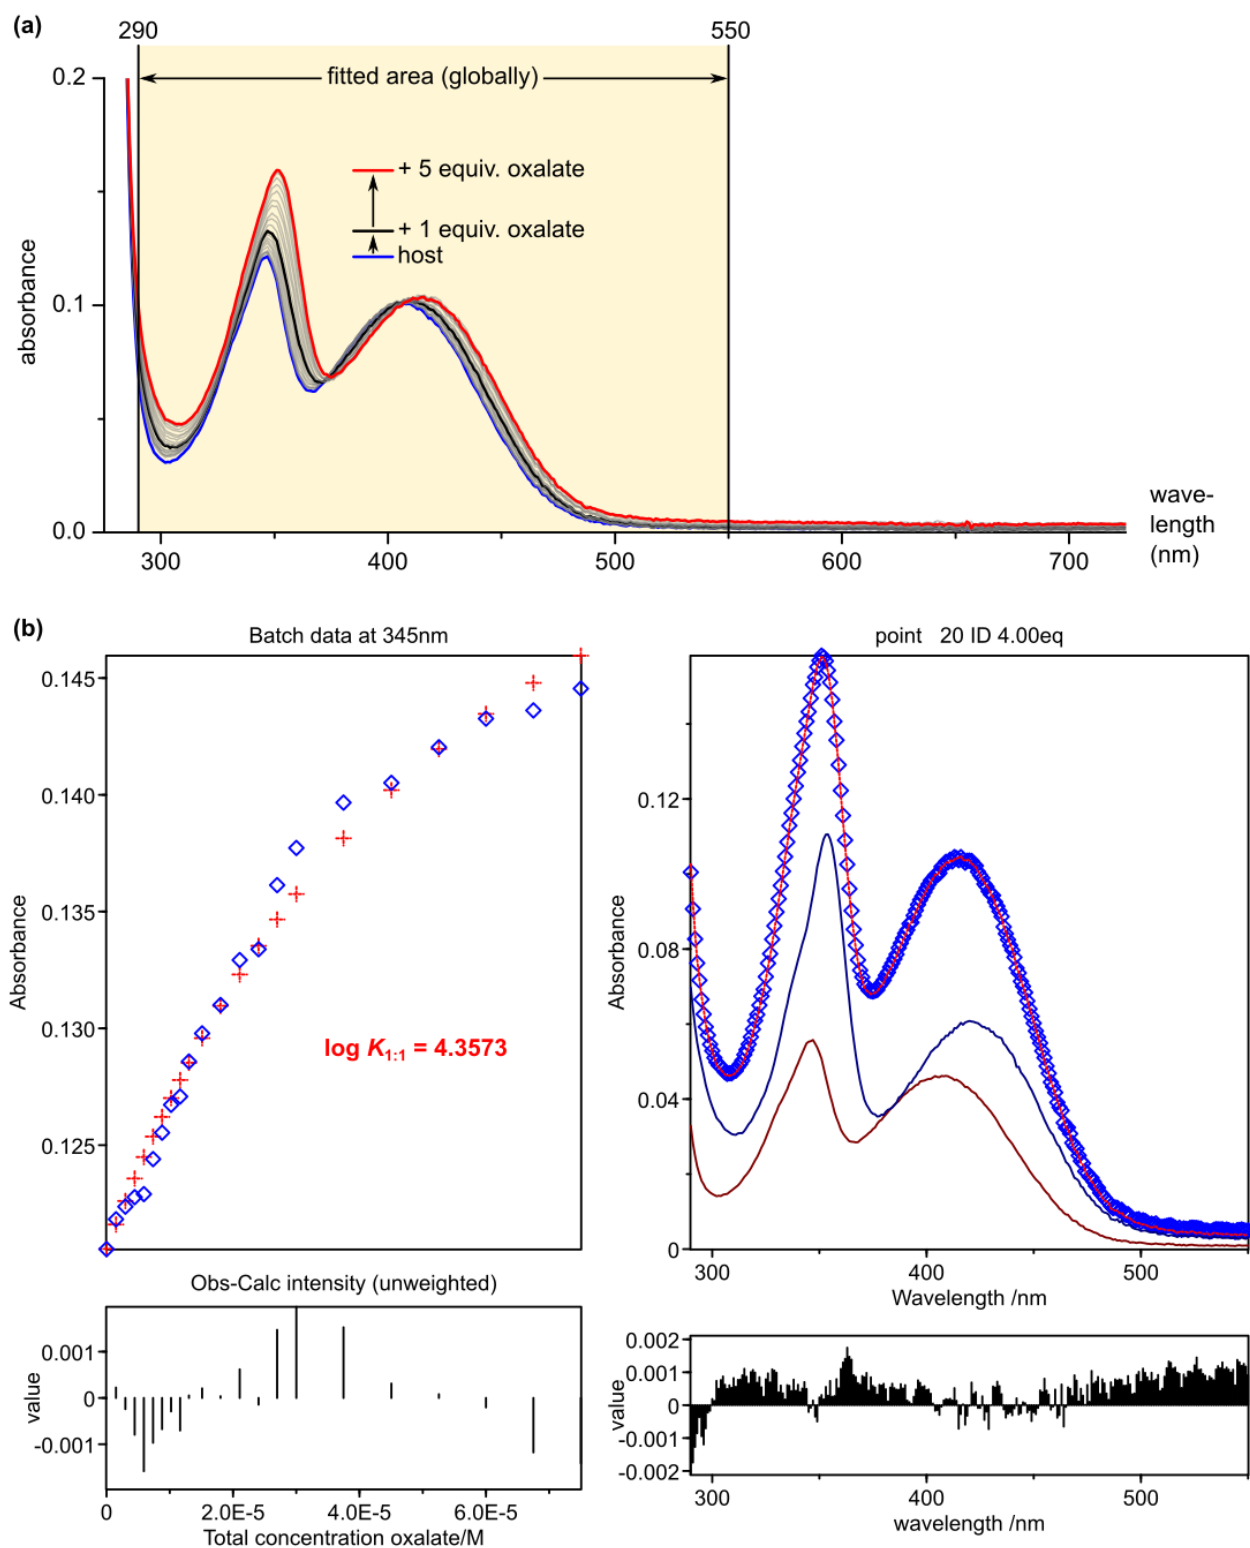

**Figure S21:** a) UV-vis titration (15  $\mu$ M,  $l = 1$  cm, DMSO- $d_6$ ) of  $[L_2Zn_2]$  with oxalate ( $C_2^{2-}$ ) as TBA salt. b) HypSpec2014 result of fitting the absorbance data in the area between 290 nm and 550 nm by applying a 1:1 binding model.

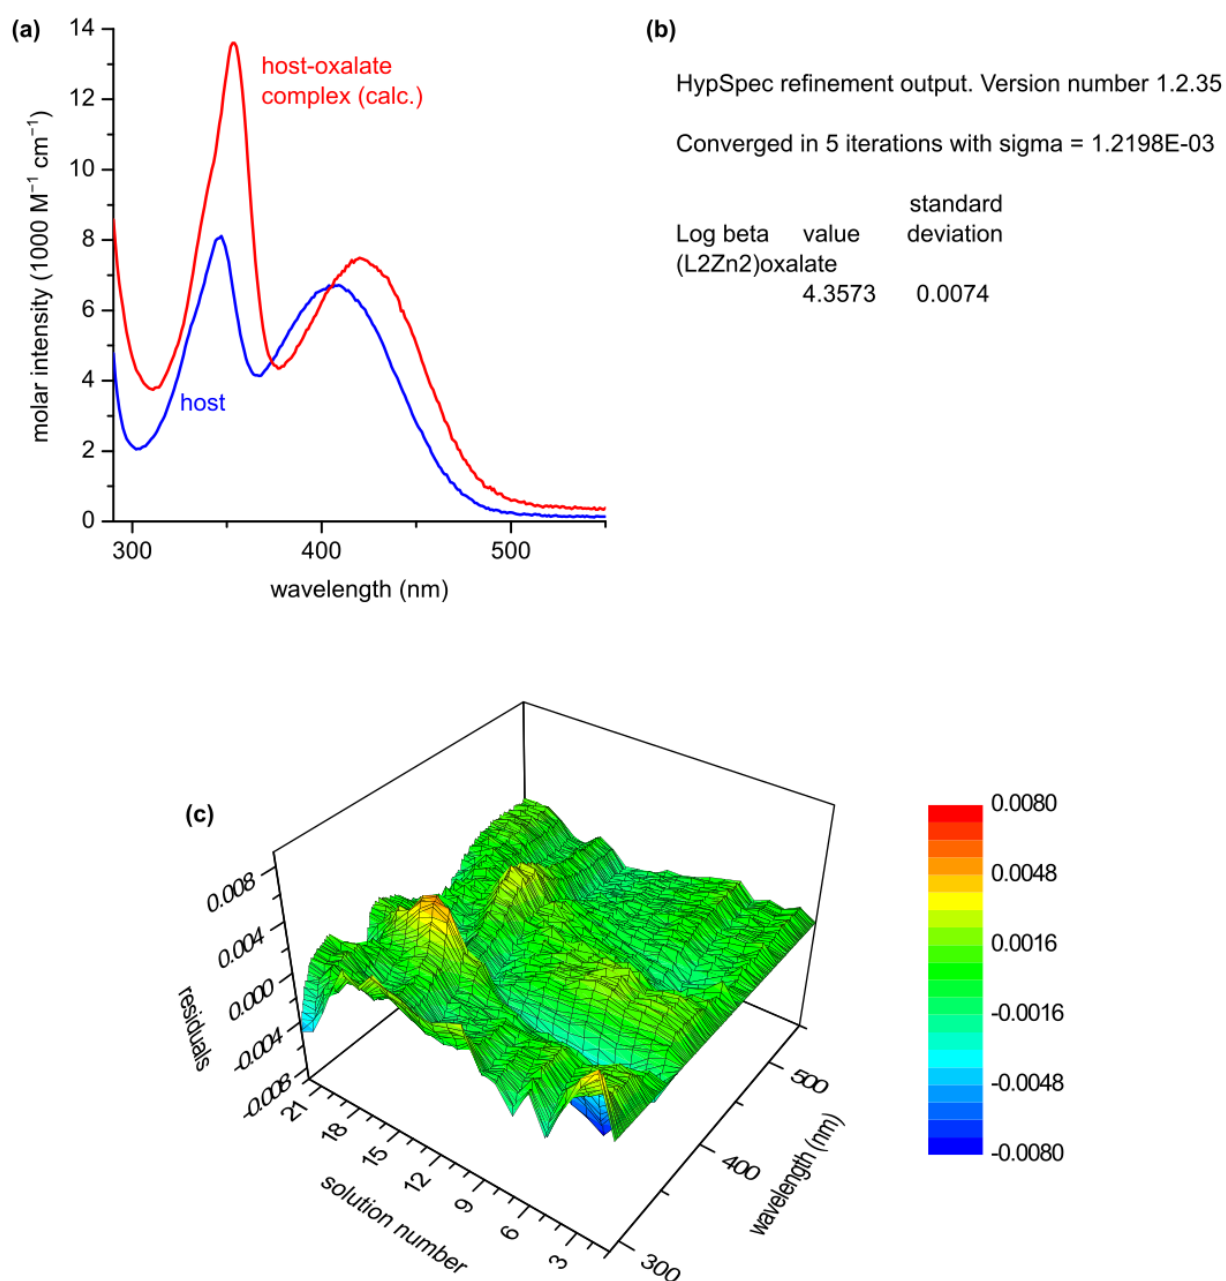

**Figure S22:** Additional information about the fitting result shown in Figure S21. a) Molar intensity of the involved absorbing species. b) Information about the fitting process. c) Residuals map = Difference between measured and calculated (fitted) data.



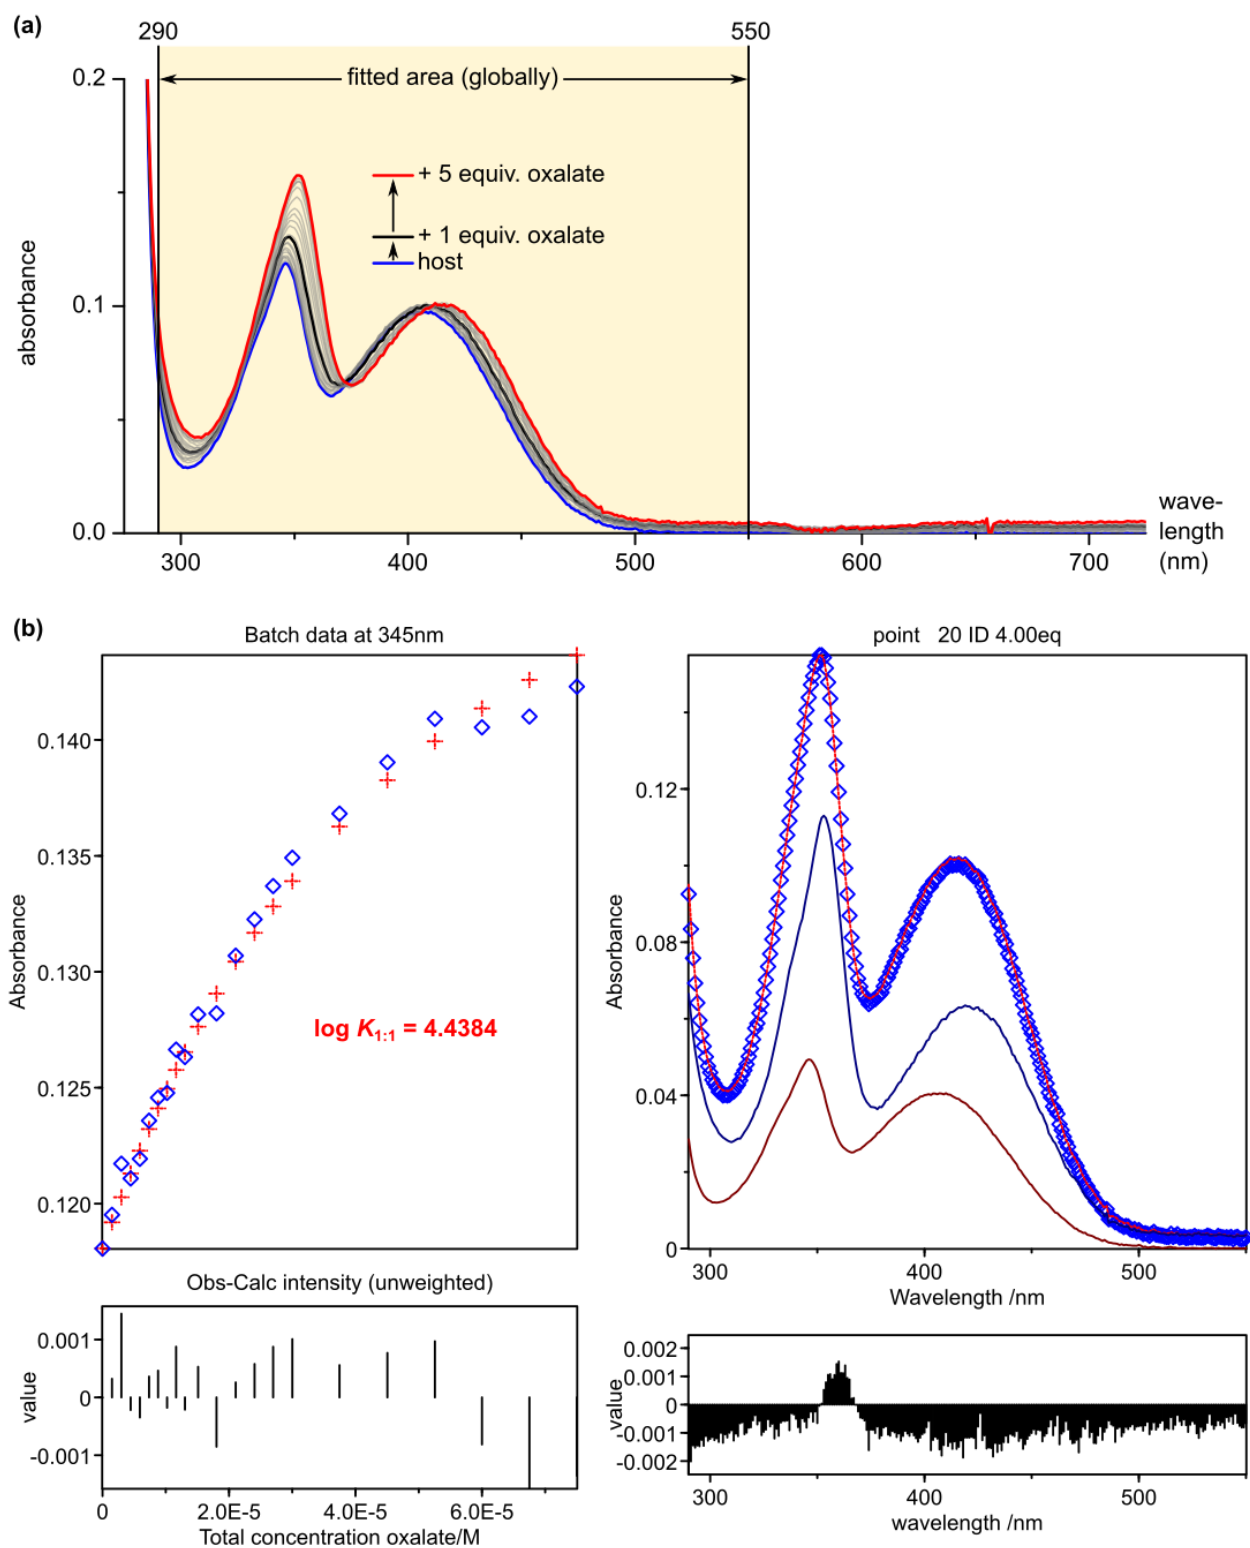

**Figure S23:** a) Repeated UV-vis titration (15  $\mu\text{M}$ ,  $l = 1$  cm,  $\text{DMSO-}d_6$ ) of  $[\text{L}_2\text{Zn}_2]$  with oxalate ( $\text{C}_2^{2-}$ ) as TBA salt. b) HypSpec2014 result of fitting the absorbance data in the area between 290 nm and 550 nm by applying a 1:1 binding model.

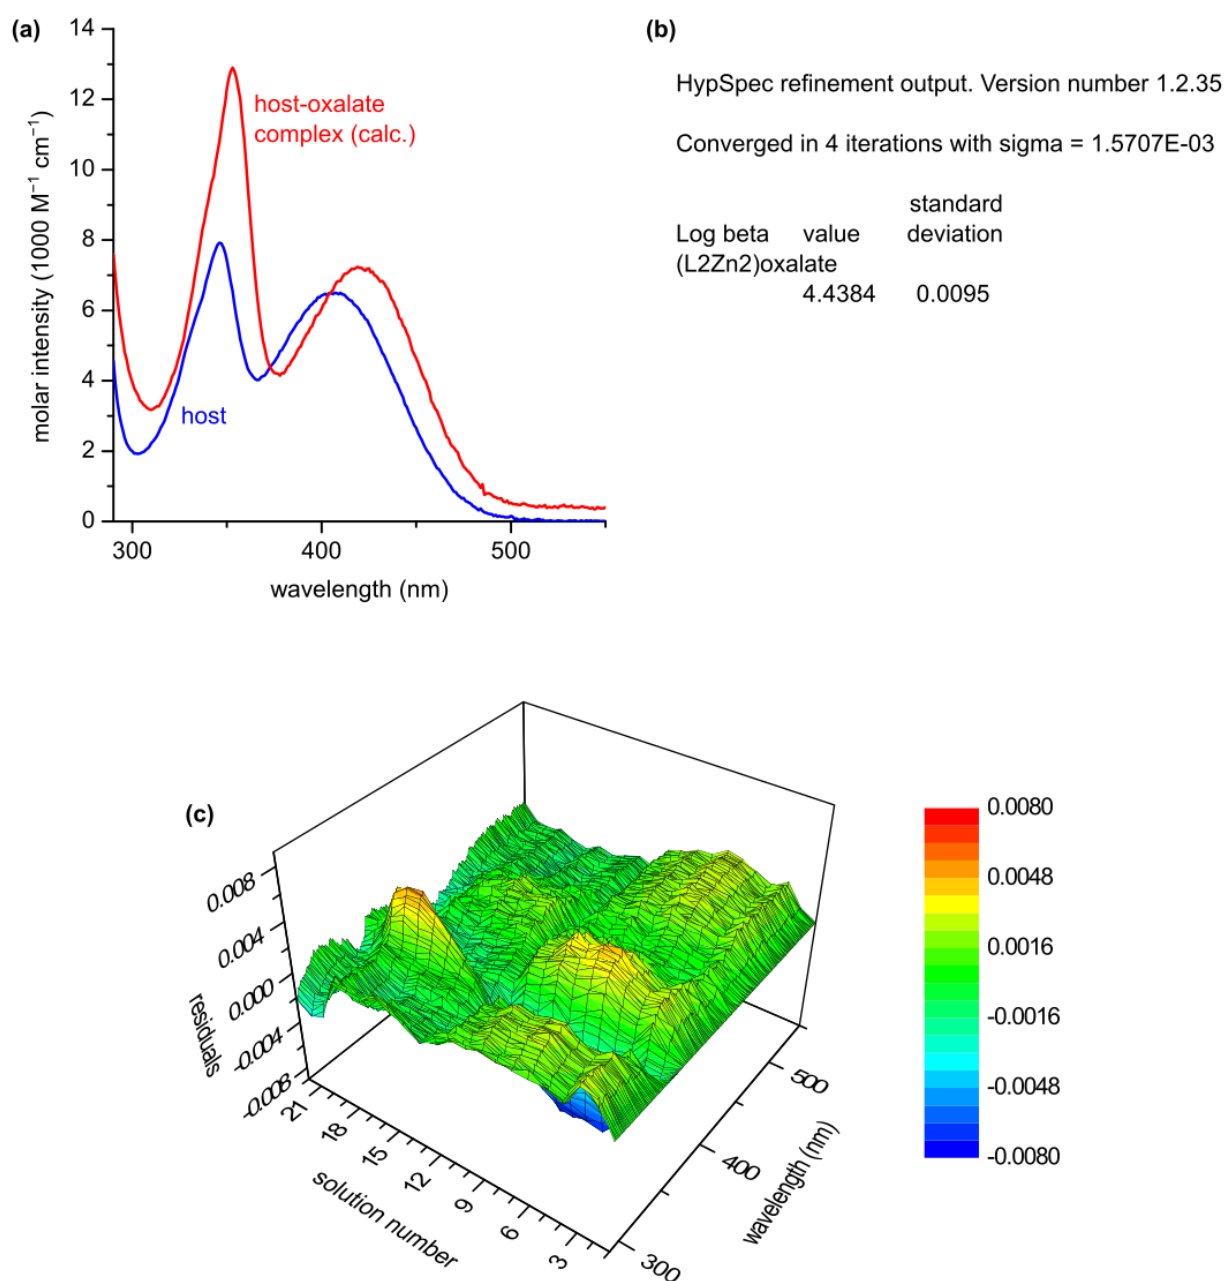

**Figure S24:** Additional information about the fitting result shown in Figure S23. a) Molar intensity of the involved absorbing species. b) Information about the fitting process. c) Residuals map = Difference between measured and calculated (fitted) data.

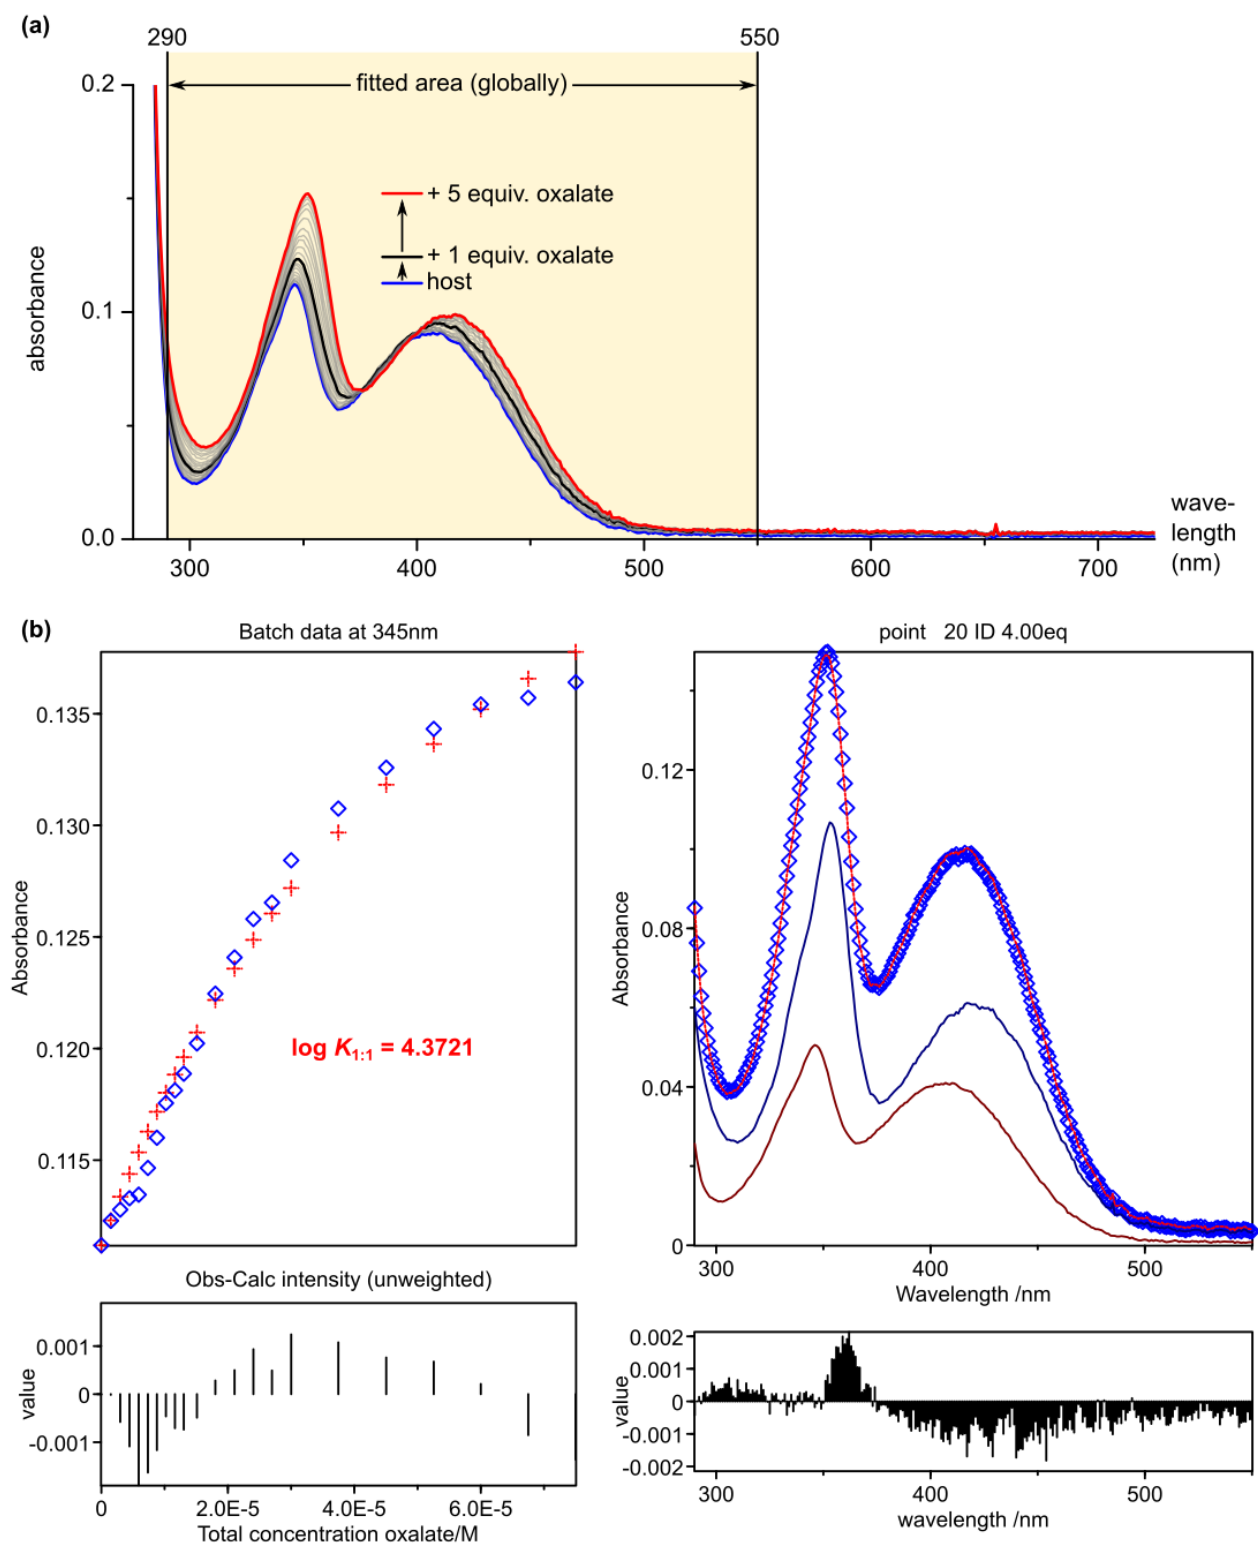

**Figure S25:** Repeated UV-vis titration (15  $\mu$ M,  $l = 1$  cm, DMSO- $d_6$ ) of  $[L_2Zn_2]$  with oxalate ( $C_2^{2-}$ ) as TBA salt. b) HypSpec2014 result of fitting the absorbance data in the area between 290 nm and 550 nm by applying a 1:1 binding model.

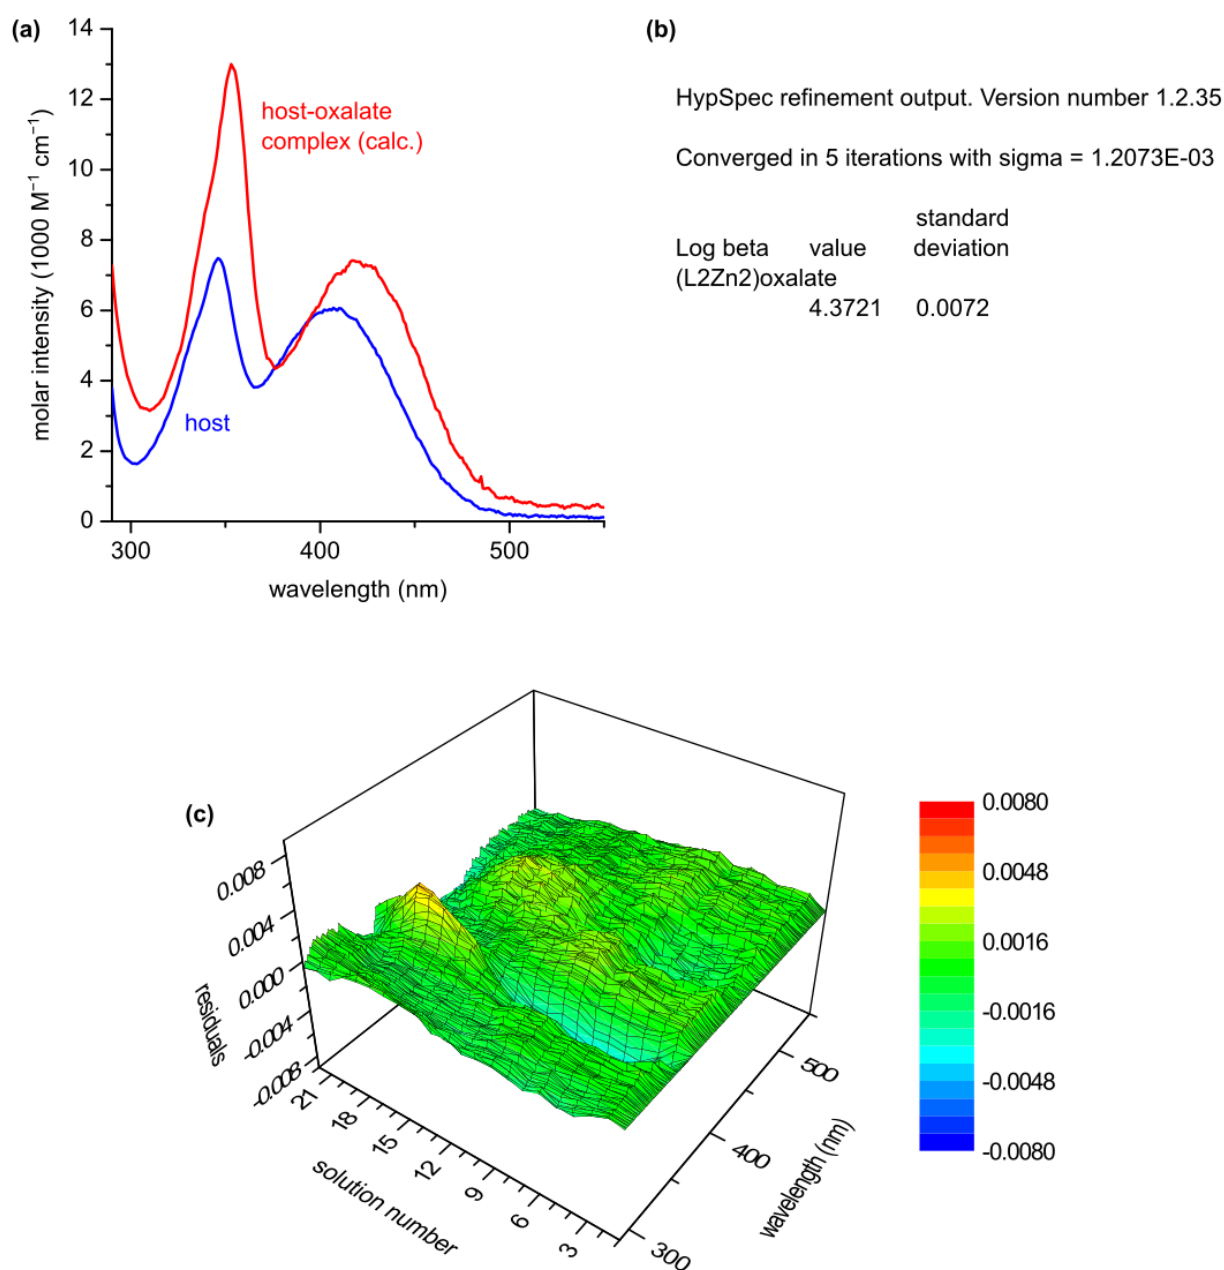

**Figure S26:** Additional information about the fitting result shown in Figure S25. a) Molar intensity of the involved absorbing species. b) Information about the fitting process. c) Residuals map = Difference between measured and calculated (fitted) data.

### 3.5. Malonate

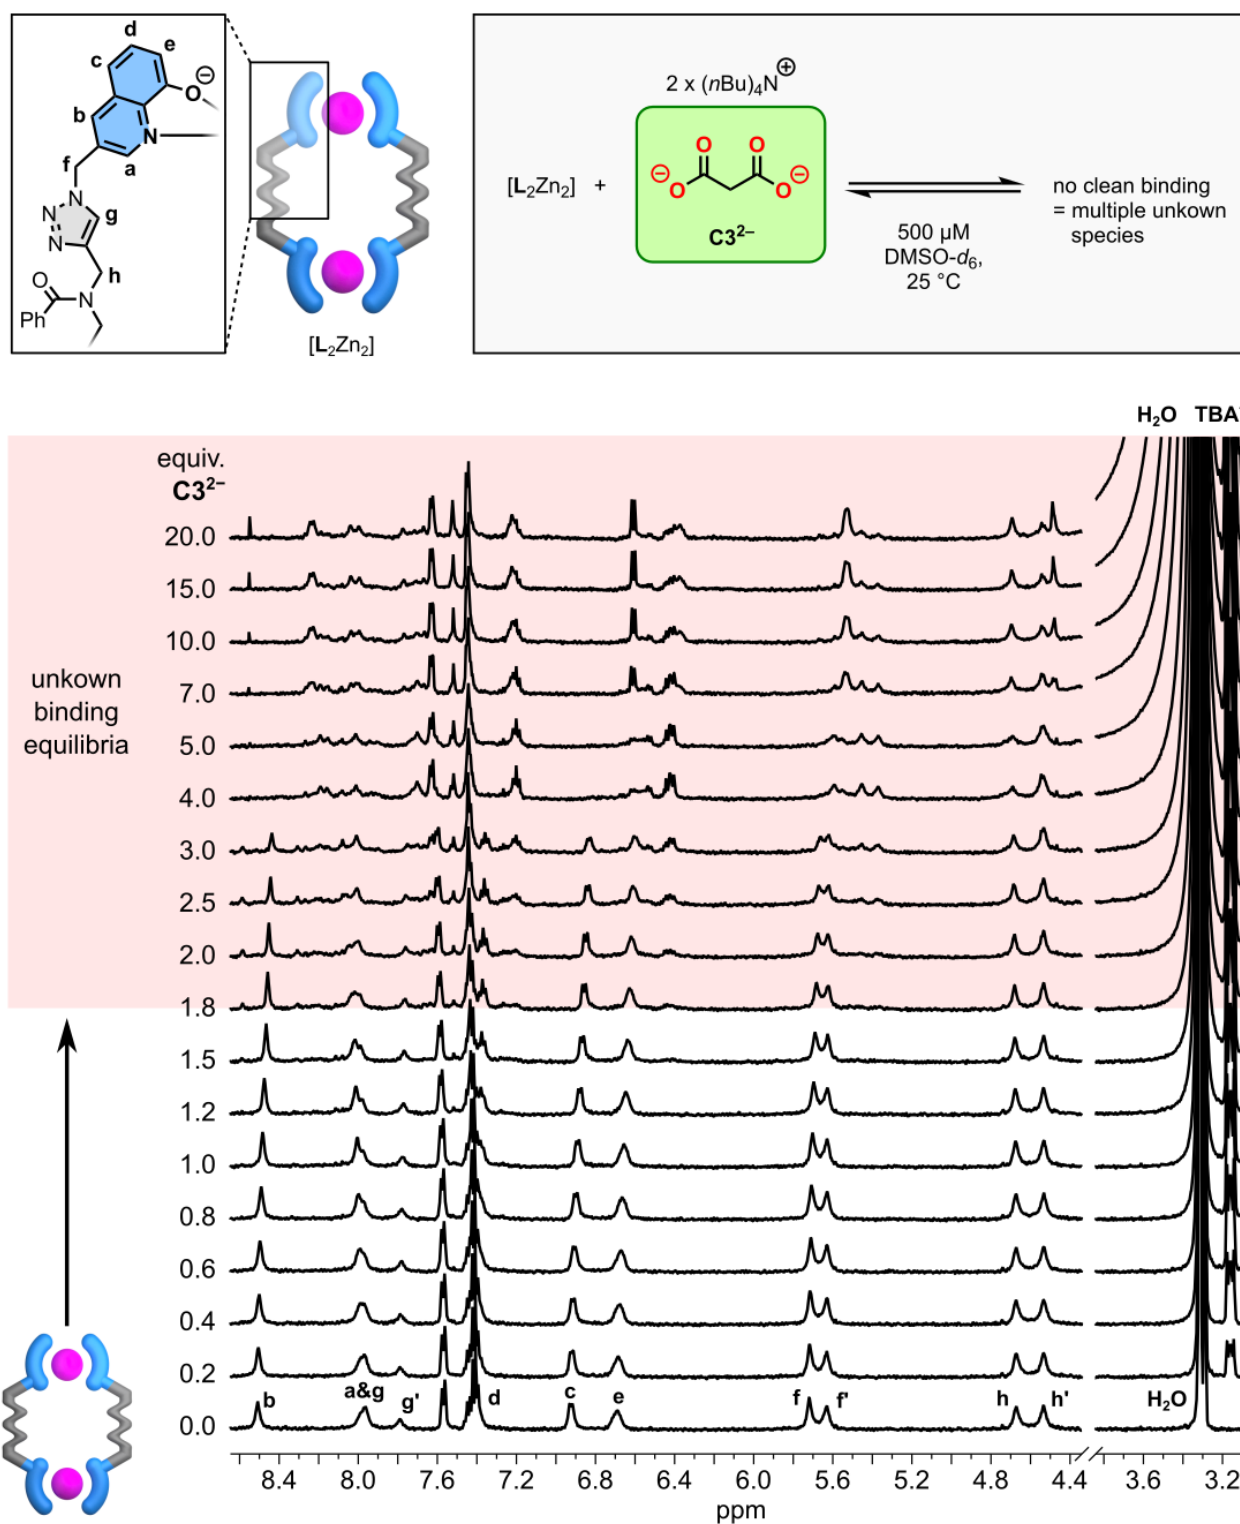

**Figure S27:**  $^1\text{H}$  NMR titration (500 MHz, 500  $\mu\text{M}$ ,  $\text{DMSO-}d_6$ , 25  $^\circ\text{C}$ ) of  $[\text{L}_2\text{Zn}_2]$  with tetrabutylammonium malonate ( $\text{C}_3^{2-}$ ).

### 3.6. Succinate

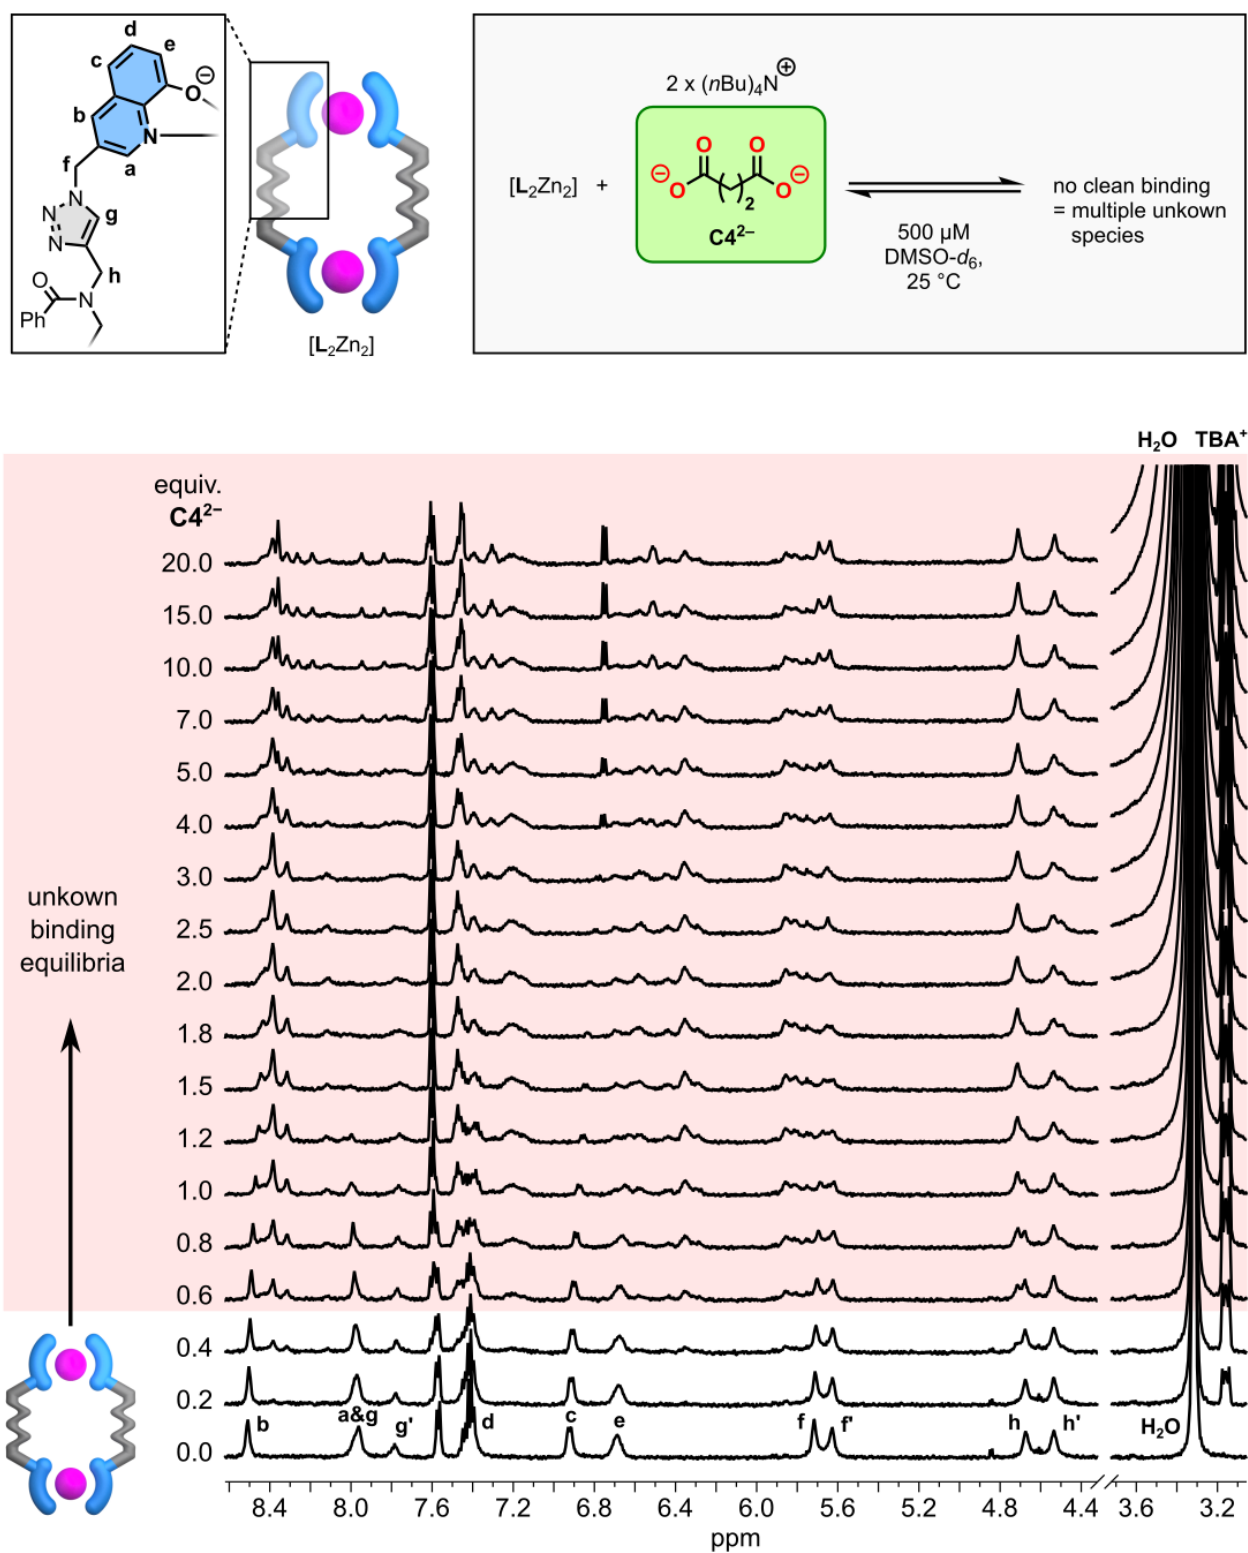

**Figure S28:**  $^1\text{H}$  NMR titration (500 MHz, 500  $\mu\text{M}$ ,  $\text{DMSO-}d_6$ ,  $25^\circ\text{C}$ ) of  $[\text{L}_2\text{Zn}_2]$  with tetrabutylammonium succinate ( $\text{C}_4^{2-}$ ).



### 3.7. Glutarate

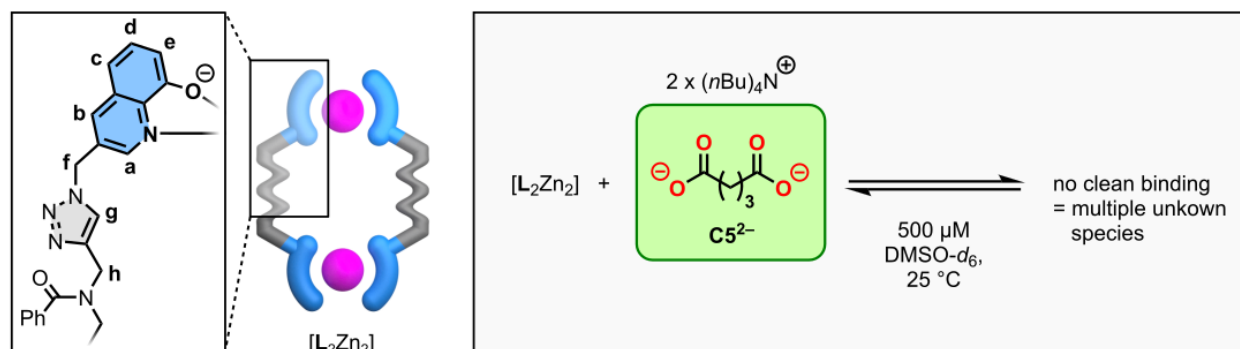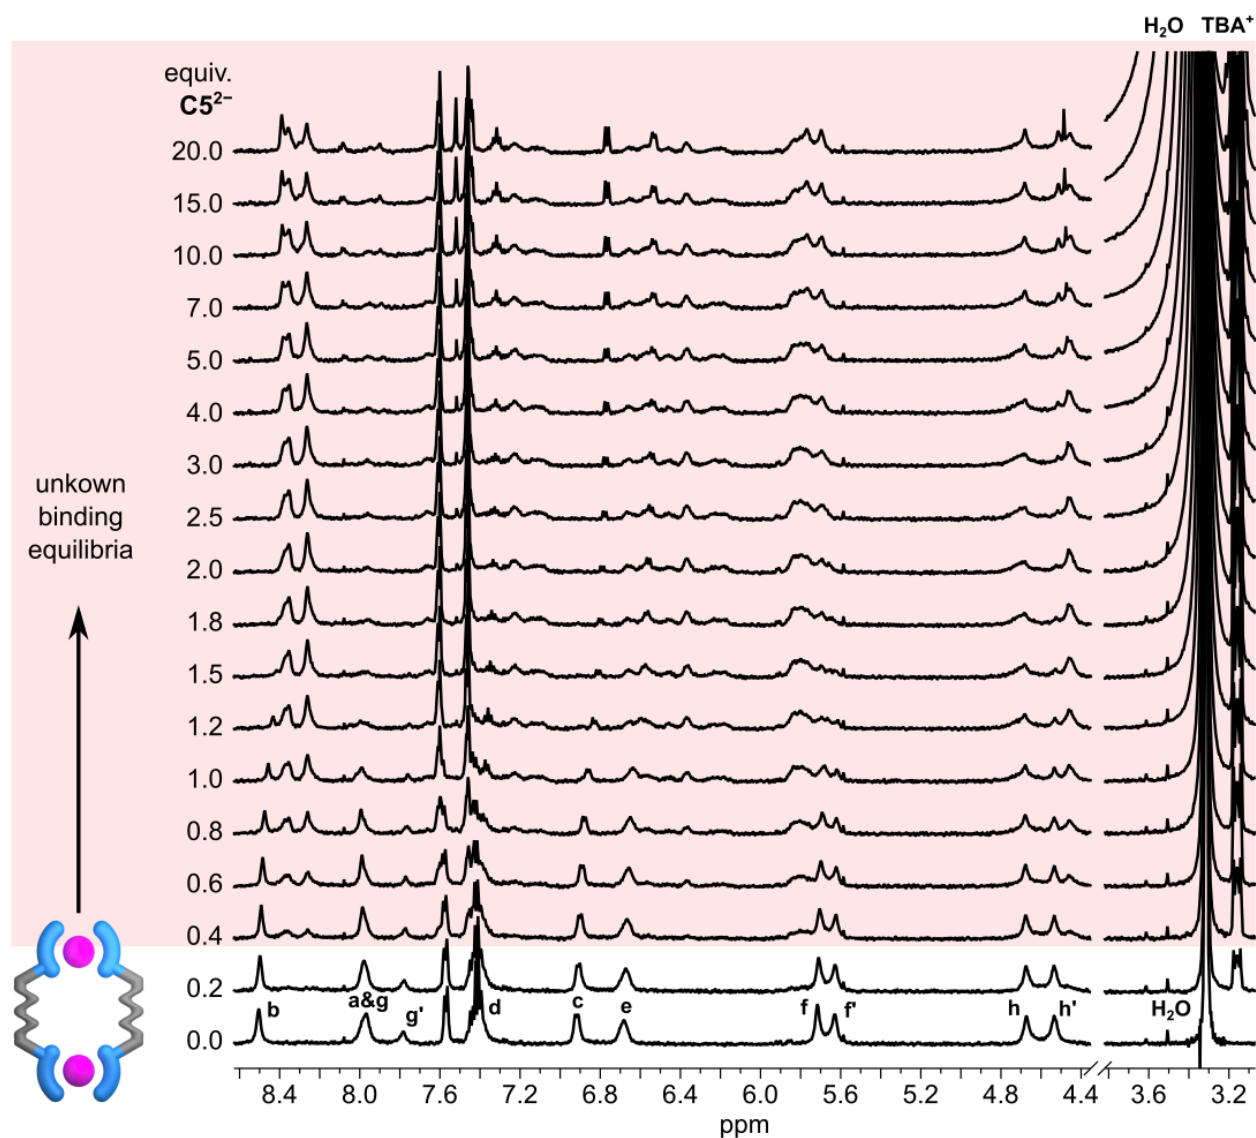

**Figure S29:**  $^1H$  NMR titration (500 MHz,  $500 \mu M$ ,  $DMSO-d_6$ ,  $25^\circ C$ ) of  $[L_2Zn_2]$  with tetrabutylammonium glutarate ( $C5^{2-}$ ).



### 3.8. Adipate

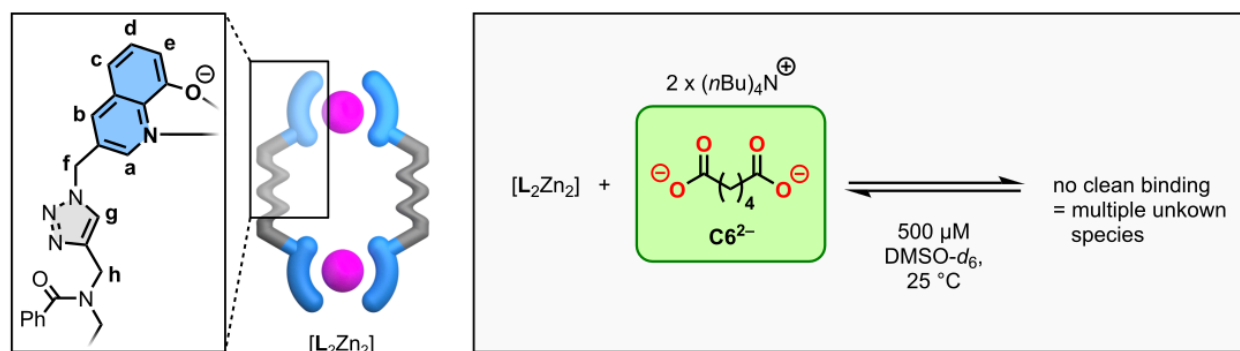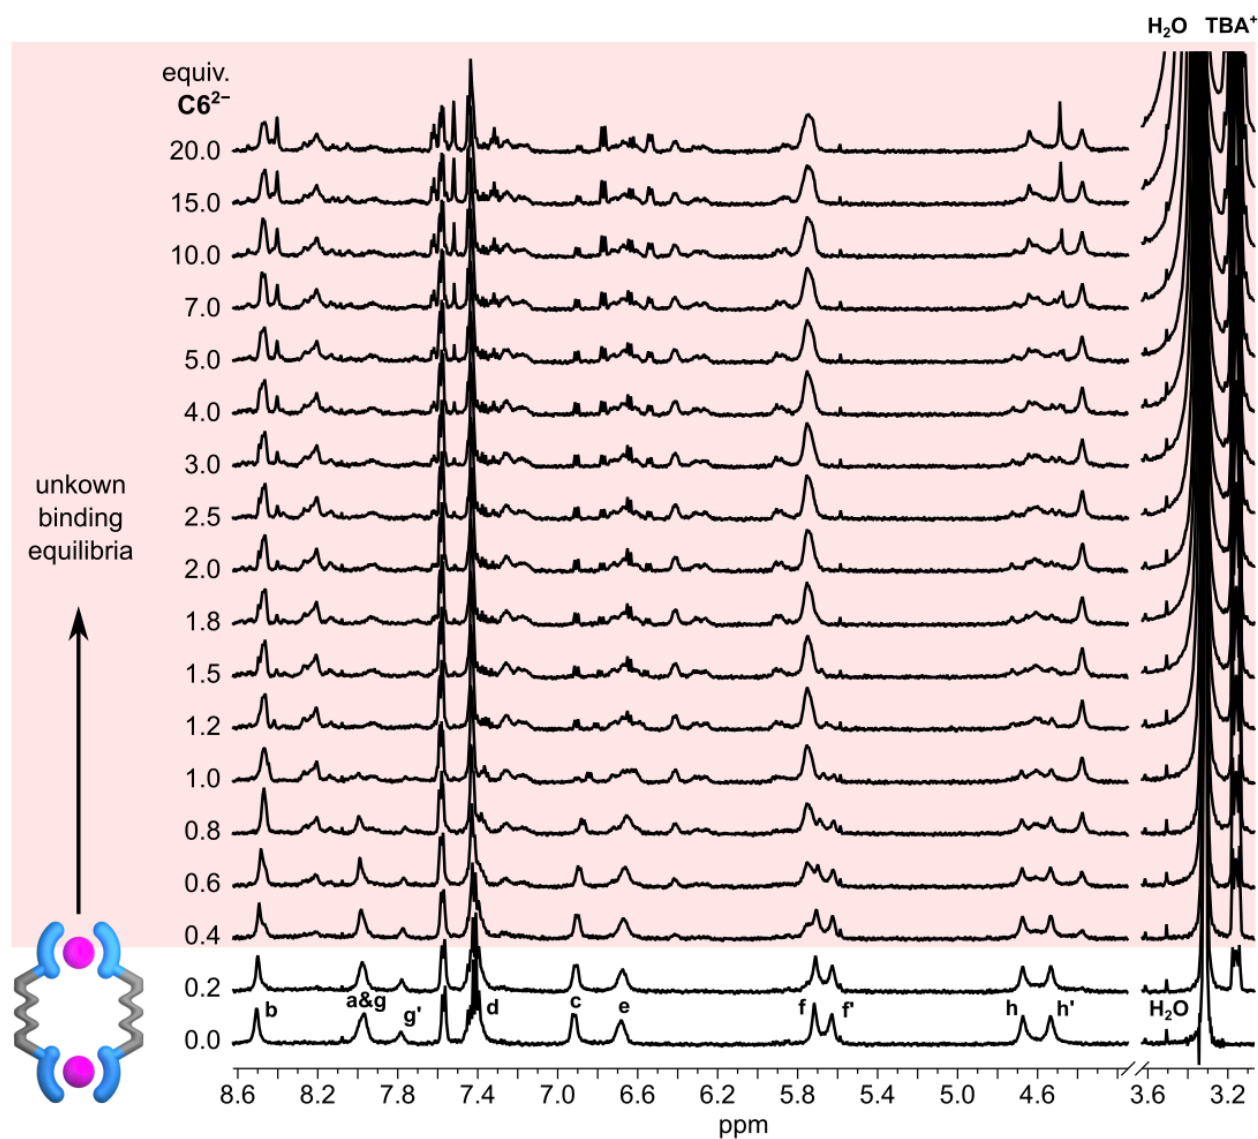

**Figure S30:**  $^1H$  NMR titration (500 MHz, 500  $\mu M$ ,  $DMSO-d_6$ ,  $25^\circ C$ ) of  $[L_2Zn_2]$  with tetrabutylammonium adipate ( $C_6^{2-}$ ).

### 3.9. Nitrate, sulfate and dithionite

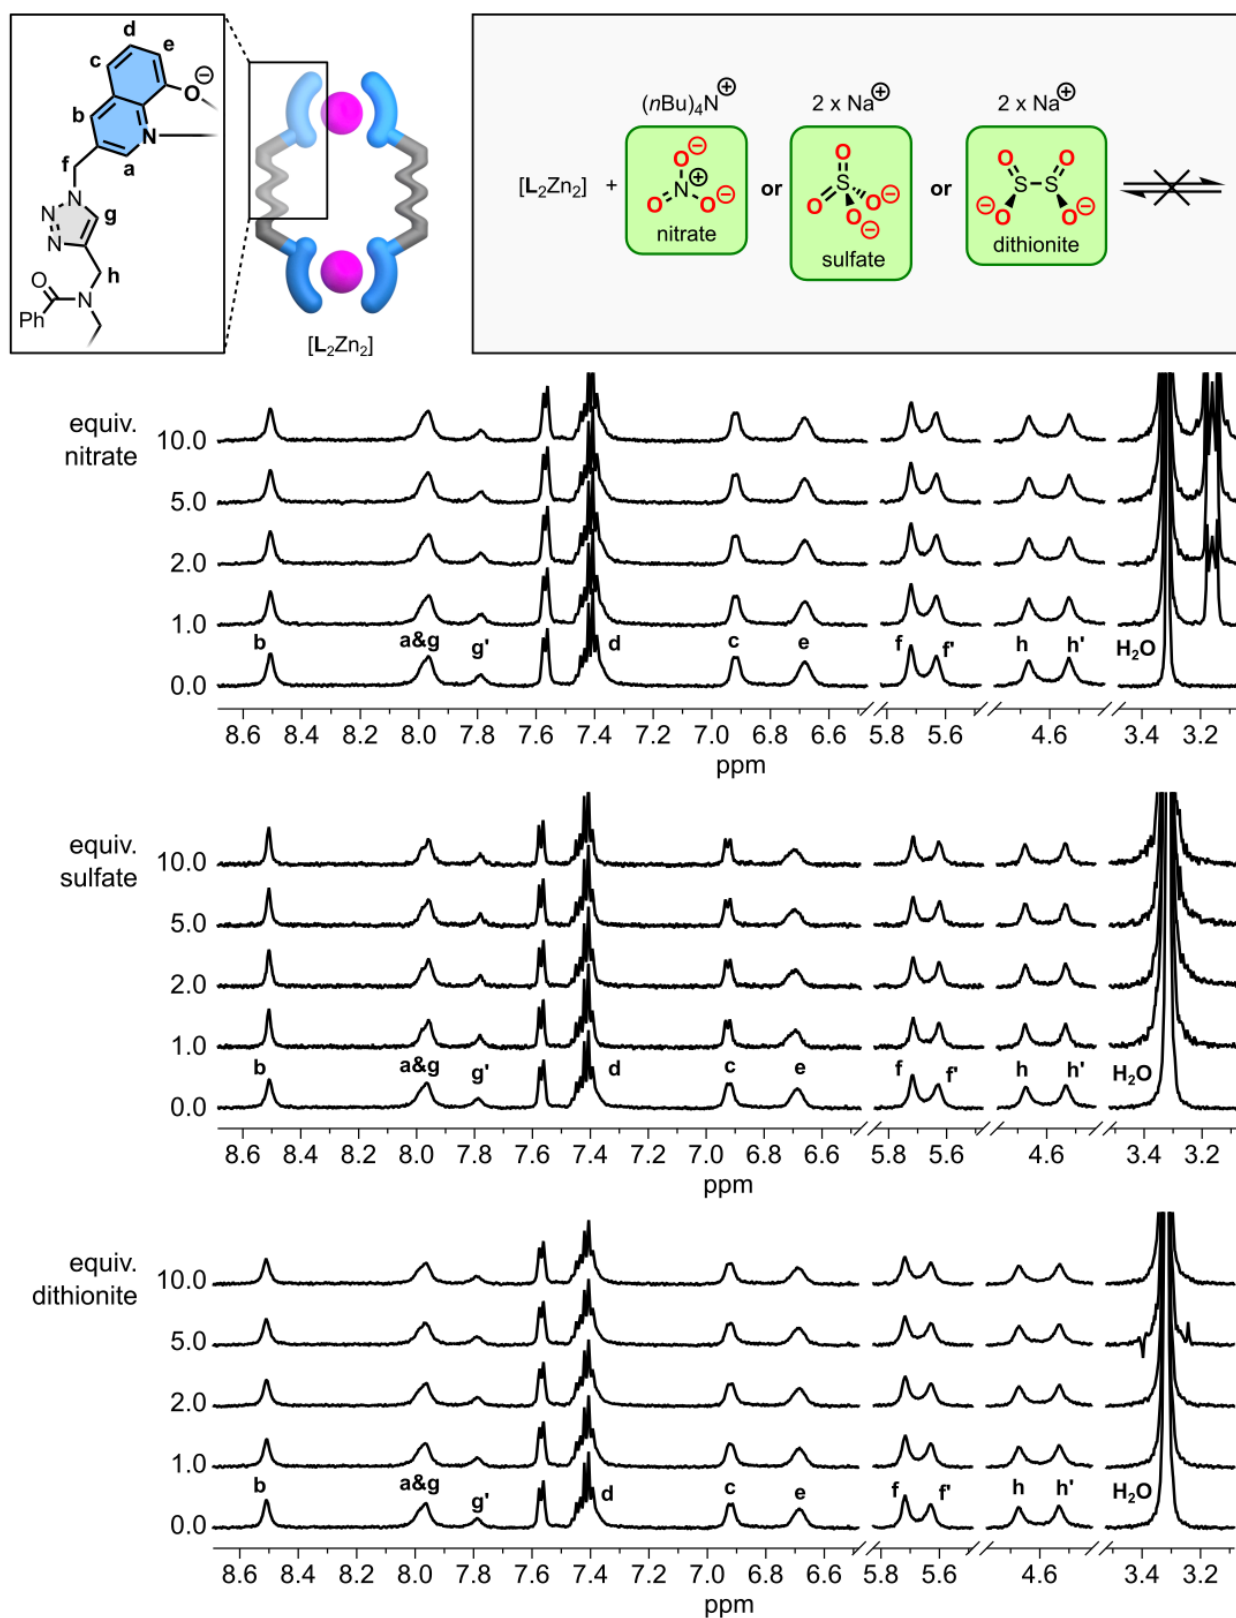

**Figure S31:**  $^1\text{H}$  NMR titration (500 MHz, 500  $\mu\text{M}$ ,  $\text{DMSO}-d_6$ , 25  $^\circ\text{C}$ ) of  $[\text{L}_2\text{Zn}_2]$  with tetrabutylammonium nitrate, sodium sulfate and sodium dithionite.

## 4. Computational studies

### 4.1. DFT calculations

The following relevant information was used in the input file's header for geometry optimization at the  $\omega$ B97X-D4<sup>[9]</sup>/def2-SVP<sup>[10,11]</sup> level of theory in DMSO (CPCM<sup>[12]</sup> solvent model applied) with ORCA 5.0.3<sup>[13,14]</sup>:

```
! wB97X-D4 def2-SVP Opt SlowConv CPCM(DMSO)
```

```
%scf autoTRAH false end
```

```
%geom trust -0.1 end
```

**XYZ data for the optimized structure of [(C2)@L<sub>2</sub>Zn<sub>2</sub>]<sup>2-</sup> (148 atoms):**

```
Zn -0.93367875677014 -0.58884770834741 2.39795959006068
Zn -0.06926467533533 0.62419665728443 -2.94789640248994
N -4.52067877950102 -3.73008890077641 -3.50707552074735
C -3.31798389779962 -4.28340071235272 -3.77495993786396
C -3.49799612730424 -5.62861413700259 -3.50518717502345
N -4.78661222823198 -5.80211216825522 -3.11197331725856
N -5.39210093935631 -4.65589643469184 -3.11469070600186
H -2.46162073319020 -3.70736848470541 -4.11536244351257
C -2.49397132616693 -6.74913154794813 -3.48502987162263
N -1.58862726438806 -6.67665104074622 -2.33013925232568
C -2.08876925128409 -7.21040816019347 -1.06485430637347
C -3.19775091501647 -6.38662425809139 -0.47404505162618
N -4.36467319371413 -6.93531136152493 -0.04774085017641
N -5.18092731008885 -5.98806427774355 0.29837294259576
N -4.56539090662876 -4.82573049697387 0.10203882944245
C -3.31315710743704 -5.01606143840465 -0.37045933740940
H -2.6359222426217 -4.20526311941864 -0.62492520888366
H -1.91350962034339 -6.75598610715602 -4.41298142848800
H -3.03530657874238 -7.70344062187541 -3.42834895445985
H -2.47303166362516 -8.22594984487071 -1.23902428283927
H -1.23862351522437 -7.27598174641636 -0.37346882393036
H -5.05206390711395 -0.93960334004970 -5.89938454791848
C -4.19195389430248 -0.67656067096353 -5.27493712434560
N -2.03519530519126 0.01339250941656 -3.67613930726644
C -3.96557797527162 -1.34575586546023 -4.09329683968309
C -3.35188867938956 0.39878348575177 -5.67719898123670
C -2.28973268454727 0.73432434429129 -4.80259956673827
C -2.82519362398606 -0.97388360277483 -3.32493474265028
C -3.56231172579797 1.15920812541033 -6.85877217030538
```

C -2.72937621778813 2.23403571587371 -7.10709824874111  
 C -1.69157650691337 2.60454274525236 -6.22518167476875  
 C -1.43501749159473 1.89124503325220 -5.04233020108132  
 H -1.06622580357468 3.47528246680972 -6.44464951673436  
 H -4.37732646986262 0.89325053517625 -7.53672624621493  
 H -2.88161541715874 2.83155045874358 -8.01264500838603  
 O -0.53124768273885 2.20903762817837 -4.18137535720043  
 H -2.57568968369662 -1.50606691364277 -2.39900223023329  
 C -4.97718675355251 -2.33756677472181 -3.57677854849500  
 H -5.86927921532921 -2.32260210377753 -4.21672288943439  
 H -5.28875429668059 -2.04681794573864 -2.56278199112074  
 C -0.56648608497969 -5.76757420518890 -2.25906977798874  
 O -0.13444062548883 -5.35752137770502 -1.18668326953503  
 C 0.04285382201172 -5.29898402476413 -3.55124811401517  
 C 1.24983680244517 -4.36841478045253 -5.89285529461487  
 C 0.25155599116914 -3.92758738613271 -3.73513323344282  
 C 0.47235645586548 -6.20696190536171 -4.52742075801221  
 C 1.08352519826497 -5.74179131112606 -5.69256054048437  
 C 0.83241230721375 -3.46020989391899 -4.91610554304503  
 H -0.04393897327654 -3.21892517012178 -2.95479950681239  
 H 0.33531582472376 -7.28112870920824 -4.37162799557041  
 H 1.42656719264085 -6.45465512203522 -6.44806033286389  
 H 0.94502991588175 -2.38011319517458 -5.05320413407721  
 H 1.71303654624980 -4.00352344380824 -6.81484381293666  
 H -6.40953779561769 -2.97653687635630 2.72592580631228  
 C -5.43690945822603 -2.49763895803003 2.57081141551916  
 N -2.96862908801822 -1.29323692475654 2.17961091354218  
 C -4.73842189307452 -2.70870983115492 1.40394851253666  
 C -4.91626141798023 -1.64205875429601 3.58241890266455  
 C -3.65084992805393 -1.05742130089168 3.33137906759340  
 C -3.48166056703157 -2.06269123809089 1.25110780345751  
 C -5.59658667494971 -1.34860571042920 4.79552573241706  
 C -4.99861653931311 -0.48713417323866 5.69571656470541  
 C -3.73952243371219 0.10656296292474 5.45534667281731  
 C -3.01618100872720 -0.15386605148077 4.28075610379829  
 H -3.30099295240911 0.78241443350841 6.19601403817566  
 H -6.57295571744910 -1.79893877440009 4.99232459318002  
 H -5.51557712871085 -0.25092079706744 6.63221933459017  
 O -1.86790530977329 0.36167805849456 3.99773772677239  
 H -2.89009526525607 -2.18822344942323 0.33862941824836  
 C -5.29094313144698 -3.57191482413796 0.29578862479690  
 H -6.32831758755653 -3.85727046517375 0.50742889055152

H -5.27342711749114 -3.02806194192028 -0.65830488878342  
C -0.68251631825129 0.76418706924993 -0.13304328717381  
C -0.32029268764360 -0.72928100271923 -0.41699671693469  
O -0.98298532371240 1.05556322945429 1.04833637438270  
O -0.01927125881791 -1.02061464449044 -1.59823040676662  
O -0.62584921444128 1.55436192870161 -1.10130381512491  
O -0.37754864582235 -1.51953544180416 0.55118010722422  
N 3.56350675201979 4.86234840536794 -0.64975219847575  
C 2.31121317185744 5.05409492984201 -0.17807096077325  
C 2.19780835162494 6.42473502752452 -0.07324702343849  
N 3.36547367764294 6.97212462491069 -0.49920075359840  
N 4.18071973927615 6.02394989046345 -0.84517887539743  
H 1.63259734208133 4.24411030012083 0.07535837618212  
C 1.08969074907056 7.24948919308567 0.51783059545165  
N 0.58819757310111 6.71481345031636 1.78219541707440  
C 1.49282956099181 6.78514379988421 2.93775475738630  
C 2.49622205808843 5.66403627967495 2.95723995892337  
N 3.78529139796376 5.83745387262913 2.56546046817541  
N 4.39028894727866 4.69097137092850 2.56732609977253  
N 3.51817046254612 3.76513813753266 2.95807725913780  
C 2.31554448065607 4.31867507583369 3.22575431033204  
H 1.45869911113864 3.74261771056175 3.56486304376901  
H 0.24002336178650 7.31704468624373 -0.17396536152409  
H 1.47525756032396 8.26428218928484 0.69345999630463  
H 2.03479936533633 7.73918996161840 2.88268366919910  
H 0.91168093131114 6.79118559838556 3.86529847784876  
H 5.40634097480985 3.01427005539017 -3.27367545508959  
C 4.43390520265713 2.53494312498283 -3.11868565663779  
N 1.96604694576111 1.32945068728304 -2.72772647775311  
C 3.73565531053956 2.74485016833085 -1.95148168095806  
C 3.91324040914483 1.67996390436120 -4.13079307627370  
C 2.64809621257365 1.09470681743284 -3.87983627504628  
C 2.47913851935650 2.09831614893780 -1.79879486759208  
C 4.59327091728685 1.38778030065189 -5.34438043138709  
C 3.99523375184634 0.52705269991340 -6.24521235493986  
C 2.73645179323474 -0.06735849389745 -6.00488779171646  
C 2.01353193913805 0.19170022646033 -4.82977827243772  
H 2.29776460943134 -0.74247803795826 -6.74612646042036  
H 5.56933657043331 1.83876765489968 -5.54118572165942  
H 4.51204219513420 0.29168898158884 -7.18201073152806  
O 0.86548332300867 -0.32453326298306 -4.54683664837855  
H 1.88780018821996 2.22315456583550 -0.88602807410948

C 4.28785780813109 3.60753925957228 -0.84276354602803  
H 5.32584585504631 3.89170208337183 -1.05298023237591  
H 4.26830632684831 3.06382611258728 0.11136713074906  
C -0.43451359101835 5.80651777599450 1.70926104408458  
O -0.86680320579932 5.39894963088528 0.63603764247203  
C -1.04548119938129 5.33729685372655 3.00043087728880  
C -2.25427870513656 4.40571916982114 5.34067870293969  
C -1.25391788707293 3.96578743126551 3.18374768743240  
C -1.47578653539316 6.24487584820454 3.97660856505844  
C -2.08784710879208 5.77919230846125 5.14108075210532  
C -1.83564842837869 3.49789344608187 4.36409912600263  
H -0.95704804957329 3.25738155885302 2.40370989310947  
H -1.33785025083110 7.31906310385291 3.82169012513271  
H -2.43196078611992 6.49175096884422 5.89638053671408  
H -1.94778852214029 2.41769015980090 4.50091648438515  
H -2.71810971460513 4.04042987684873 6.26219441642064  
H 4.04850828173065 0.97522237906827 5.34968046122017  
C 3.18844308778426 0.71203938172242 4.72523211179342  
N 1.03166259266578 0.02187264300300 3.12649493874829  
C 2.96225429216649 1.38082262347403 3.54332532535173  
C 2.34807260252940 -0.36291901934668 5.12787190129975  
C 1.28596609627102 -0.69860000485486 4.25329681303611  
C 1.82189771847516 1.00885210613240 2.77495886367758  
C 2.55803813239885 -1.12280900888736 6.30987797667509  
C 1.72497033339156 -2.19748459025095 6.55840436618104  
C 0.68736091555407 -2.56827508766427 5.67637541915891  
C 0.43108729779701 -1.85533057254182 4.49326443727757  
H 0.06192952959273 -3.43891896154592 5.89599968248713  
H 3.37287705579734 -0.85662400878842 6.98795336331831  
H 1.87686425271880 -2.79458357618981 7.46428244376339  
O -0.47253777549419 -2.17324230677809 3.63220657922956  
H 1.57291952778093 1.54049464837625 1.84855623606059  
C 3.97393438075058 2.37231964561978 3.02639471901246  
H 4.86664519753088 2.35655712463409 3.66544608467956  
H 4.28429045776948 2.08189103291721 2.01193231750125

## 4.2. MD simulation

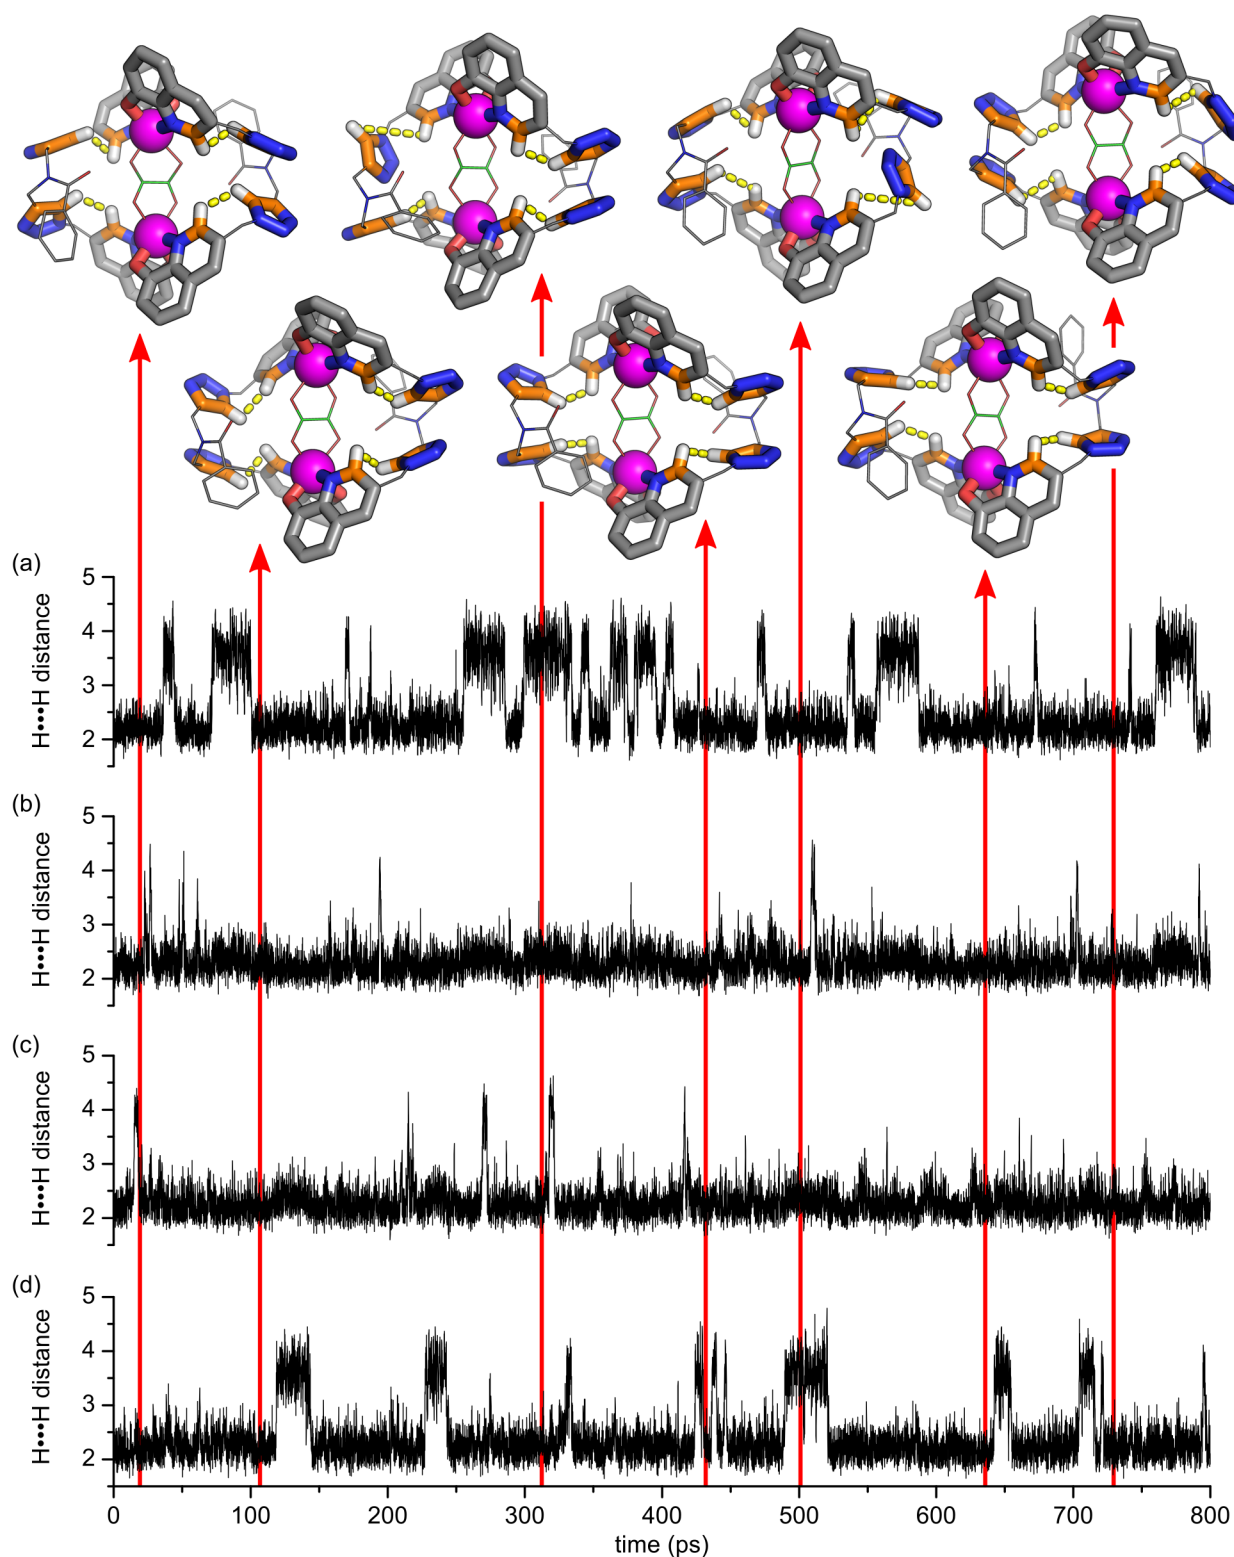

**Figure S32:** Distance between the triazole proton and the proton in the 2-position of the quinolate unit for all four contacts marked with yellow dashes (a: up left, b: up right, c: down left, and d: down right). Seven snapshots elucidate the possible triazole rotations which take place at 25 °C (xTB 6.6.0<sup>[15,16]</sup>, see relevant information regarding the set-up on the next page).

The following command line was used to start the MD simulation with a prior geometry optimization (below with "...." as placeholder for the file names):

```
xtb "input-file".xyz --chrg -2 --cosmo dmso --omd --input "control-file".ctrl --parallel 20 > "output-file".out
```

The control file contained the following information about the simulation time (800 ps) and the applied constraints for the quinolate-zinc coordination bonds (oxalate-zinc coordination bonds were not constrained):

```
$md
    time=800
$end

$constrain
    atoms: 1, 56
    atoms: 1, 68
    atoms: 1, 132
    atoms: 1, 144
    atoms: 2, 24
    atoms: 2, 36
    atoms: 2, 100
    atoms: 2, 112
$end
```

## 5. References

- [1] Van Craen, D.; Kalarikkal, M. G.; Holstein, J. J. *J. Am. Chem. Soc.*, **2022**, *144*, 18135-18143.
- [2] Hashmi, A. S. K.; Molinari, L.; Rominger, F.; Oeser, T. *Eur. J. Org. Chem.* **2011**, 2256-2264.
- [3] Smedley, C. J.; Barrow, A. S.; Spiteri, C.; Giel, M.-C.; Sharma, P.; Moses, J. E. *Chem. Eur. J.* **2017**, *23*, 9990-9995.
- [4] Dai, H.; Liu, G.; Zhang, X.; Yan, H.; Lu, C. *Organometallics* **2016**, *35*, 1488-1496.
- [5] <http://supramolecular.org> (Accessed for data fitting in July, August and October, 2023)
- [6] Hibbert, D. B.; Thordarson, P. *Chem. Commun.* **2016**, *52*, 12792-12805.
- [7] Thordarson, P. *Chem. Soc. Rev.* **2011**, *40*, 1305-1323.
- [8] Gans, P.; Sabatini, A.; Vacca, A. *Talanta* **1996**, *43*, 1739-1753.
- [9] Najibi, A.; Goerigk, L. *J. Comput. Chem.* **2020**, *41*, 2562-2572.
- [10] Weigend, F.; Ahlrichs, R. *Phys. Chem. Chem. Phys.* **2005**, *7*, 3297-3305.



- [11] Weigend, F. *Phys. Chem. Chem. Phys.* **2006**, *8*, 1057-1065.
- [12] Barone, V.; Cossi, M. *J. Phys. Chem. A* **1998**, *102*, 1995-2001.
- [13] Neese, F. *WIREs Comput. Mol. Sci.* **2012**, *2*, 73-78.
- [14] Neese, F. *WIREs Comput. Mol. Sci.* **2022**, *12*, e1606.
- [15] Bannwarth, C.; Caldeweyher, E.; Ehlert, S.; Hansen, A.; Pracht, P.; Seibert, J.; Spicher, S.; Grimme, S. *WIREs Comput. Mol. Sci.* **2021**, *11*, e1493.
- [16] Bannwarth, C.; Ehlert, S.; Grimme, S. *J. Chem. Theory Comput.* **2019**, *15*, 1652-1671.
